# Supplementary material for: Agile synthesis and automated, high-throughput evaluation of diglycolamides for liquid–liquid extraction of rare-earth elements
Source: Royal Society of Chemistry journal article supplement (doi:10.1039/d4gc01146e), 2024-01-01
Supplement: d4gc01146e1.pdf [file d4gc01146e1.pdf]

**Supporting Information for**

**Agile Synthesis and Automated, High-Throughput Evaluation of**

**Diglycolamides for Liquid-Liquid Extraction of Rare-Earth**

**Elements**

Lun An,<sup>a†</sup> Yue Yao,<sup>b†</sup> Tyler B. Hall,<sup>a</sup> Fu Zhao,<sup>b,c\*</sup> Long Qi<sup>a\*</sup>

<sup>a</sup> U.S. DOE Ames National Laboratory, Ames, Iowa 50011, USA.

<sup>b</sup> School of Environmental and Ecological Engineering, Purdue University, West Lafayette, IN 47907, USA.

<sup>c</sup> School of Mechanical Engineering, Purdue University, West Lafayette, IN 47907, USA.

\*Correspondence to: lqi@iastate.edu, fzhao@purdue.edu

## 1. General Methods

All reagents and solvents were purchased from commercial sources and used without further purification unless specified. Diglycolic acid was purchased from TCI America. The secondary amines used for DGA synthesis were purchased from Oakwood Chemicals, Combi Blocks, or Thermo Fisher Scientific. Commercial TODGA was purchased from Ambeed. Lanthanide chlorides (>99.9% purity) and nitrates (>99.9% purity) were purchased from Sigma-Aldrich or Thermo Fisher Scientific Inc. Deionized water was obtained from a Barnstead E-pure system. Trace-metal grade hydrochloric acid (HCl) and nitric acid (HNO<sub>3</sub>) were purchased from Fisher Scientific. Isopar L and Tridecyl Alcohol Exxal 13 were purchased from Univar Solutions. Nuclear magnetic resonance (NMR) spectra were obtained on a Bruker AV-600 or NEO-400 instrument. The chemical shifts ( $\delta$ ) are given in parts per million (ppm) relative to CDCl<sub>3</sub> (7.26 ppm for <sup>1</sup>H) or TMS (0 ppm for <sup>1</sup>H) and CDCl<sub>3</sub> (77.0 ppm for <sup>13</sup>C) and coupling constants (*J*) are reported in Hertz (Hz). The following abbreviations were used to explain the multiplicities: s = singlet, d = doublet, t = triplet, m = multiplet, br = broad. Electrospray ionization high-resolution mass spectra (ESI-HRMS) were recorded using an LTQ FT-ICR mass spectrometer equipped with an electrospray ionization source (Finnigan LTQ FT, Thermo Fisher Scientific, Waltham, MA) operated in positive ion mode. Inductively Coupled Plasma Optical Emission Spectroscopy (ICP-OES) spectra were obtained on an Agilent 5800 ICP-OES instrument.

## 2. Synthesis of Diglycolamides

### 2.1 TODGA Synthesis via Schotten-Baumann Method:

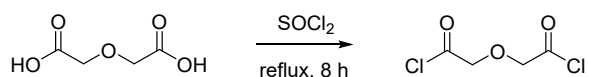

**Step 1:**<sup>1</sup> Under a nitrogen atmosphere, a mixture of diglycolic acid (1.35 g, 10 mmol) and thionyl chloride (23.80 g, 200 mmol, 20 equiv.) was refluxed (85 °C) in a 50 mL round bottom flask (RBF) for 8 hours. The reaction mixture was then cooled to room temperature, and the unreacted thionyl chloride was removed by vacuum evaporation. The crude diglycolyl chloride was used in step 2 without further purification.

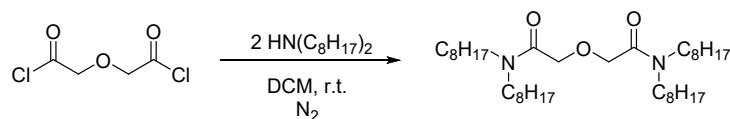

**Step 2:**<sup>2,3</sup> The crude diglycolic chloride (10 mmol, 1.0 equiv.) from Step 1 in anhydrous Et<sub>2</sub>O (60 mL) was added dropwise to an aqueous solution (36 mL) of dioctyl amine (21 mmol, 2.1 eq) and NaOH (1.20 g, 30 mmol) in a 250 mL RBF at 0 °C over 30 min. The reaction mixture was stirred at 0 °C for 2 h. Subsequently, the two phases were separated and the aqueous layer was extracted with Et<sub>2</sub>O (3 × 30 mL). The combined organic layers were washed sequentially with aqueous HCl (5 wt%, 50 mL), saturated aqueous NaHCO<sub>3</sub> solution (50 mL), water (50 mL), and brine (50 mL). The organic layer was collected and dried over anhydrous Na<sub>2</sub>SO<sub>4</sub> (25 g). After filtration and evaporation under vacuum, the residue was purified by silica gel (200 g) column chromatography using hexanes/ethyl acetate as the eluent. The product 2,2'-oxybis(*N,N'*-dioctylacetamide) or TODGA was obtained as a colorless oil, 4.94 g, 85% yield.

## 2.2 General Procedure for the Two-Step Melt Amidation Synthesis of DGA

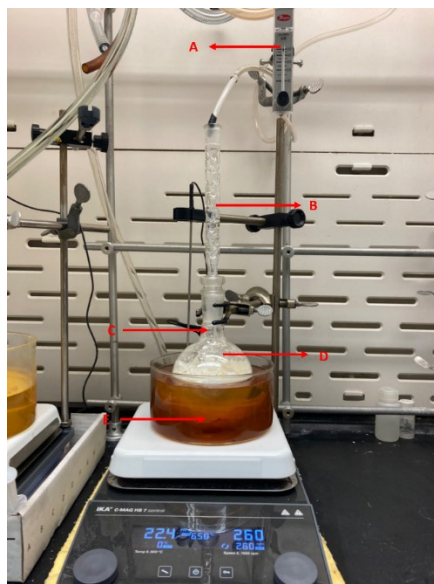

**Figure S1.** Details of the reaction setup. (A) N<sub>2</sub> flowmeter, (B) Air condenser (20 cm). (C) PTFE tubing for N<sub>2</sub> flow, (D) 500 mL RBF, and (E) high-temperature silicone oil bath.

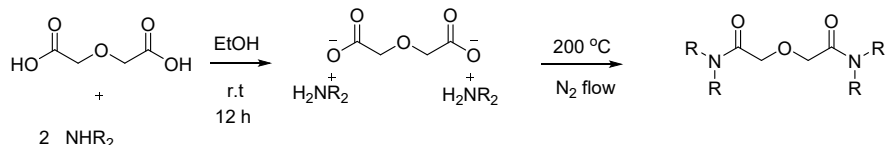

**Step 1:** To an ethanolic solution of dialkyl amine (2.0 equiv., 5 M) in an RBF was added solid diglycolic acid (1.0 equiv.) portion-wise at room temperature. The resulting mixture was stirred at room temperature overnight. After which, ethanol was recovered, giving the ammonium salt as a white solid in quantitative yield.

**Step 2:** To an RBF, the ammonium salt from Step 1 and a magnetic stir bar were introduced. Nitrogen ( $\text{N}_2$ ) was then purged into the RBF through a Teflon tube at a flow rate of 100 ccm. After purging with  $\text{N}_2$  for 10 minutes, the RBF was equipped with an air condenser (20 cm). The reaction mixture was subsequently heated to 200  $^\circ\text{C}$  under stirring and maintained at this temperature for 24 hours under  $\text{N}_2$  flow (100 ccm). After cooling down to room temperature, TODGA was obtained as a pale yellow oil. The purity of the produced DGA was determined by  $^1\text{H}$  NMR in  $\text{CDCl}_3$ . Using *N,N,N',N'*-tetra(n-hexyl)diglycolamide (THDGA) **4a** as an example, The main by-product detected by  $^1\text{H}$ -NMR was the monosubstituted product, 2-(2-(dihexylamino)-2-oxoethoxy)acetic acid, which shows two asymmetric O- $\text{CH}_2$ -CO signals at 4.20 ppm and 4.38 ppm.<sup>4</sup> The purity of the product was ascertained by comparing the integration of the O- $\text{CH}_2$ -CO peak at 4.30 ppm, attributed to the main product, against the integration of the O- $\text{CH}_2$ -CO peak at 4.20 and 4.38 ppm, associated with the side product (Figure S1.1). To further validate the purity, trimethoxybenzene was introduced as an internal standard, with the results detailed in Figure S19 of the supporting information.

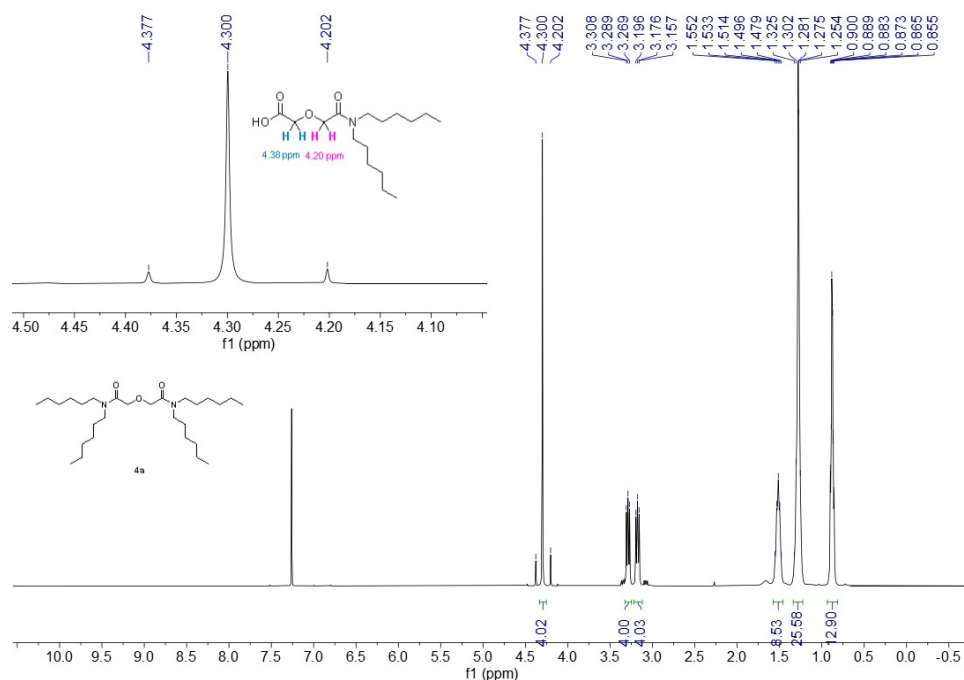

**Figure S1.1.** Determination of the purity of **4a** by  $^1\text{H}$ -NMR.

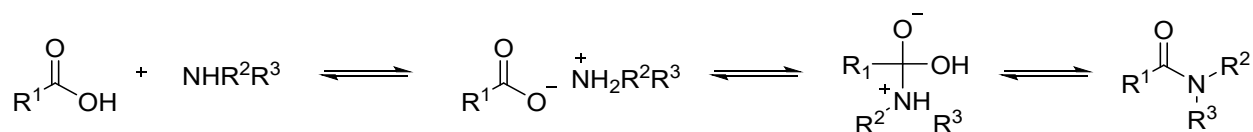

**Scheme S1.** Proposed mechanism for the direct amidation of carboxylic acids.

### 2.3 One-pot synthesis of TEHDGA at 200 g scale

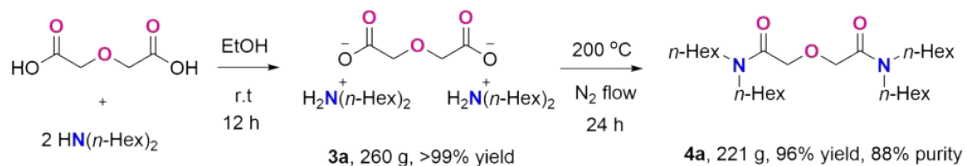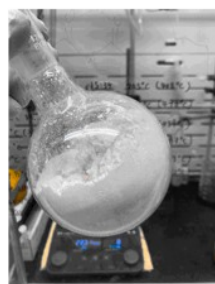

**3a**, 260 g

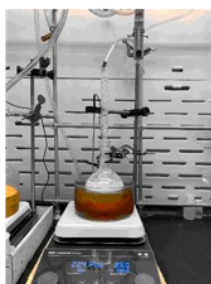

Reaction setup for melt amidation

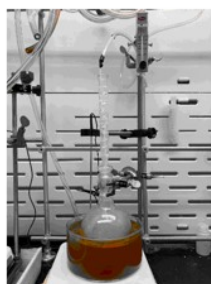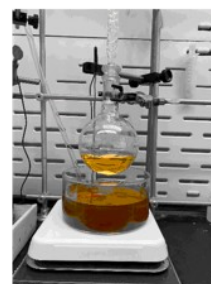

**THDGA**, 221 g

### Scheme S2. 200-gram scale one-pot synthesis of **4a**.

In a 500 mL RBF, to an ethanolic solution (200 mL) of dihexyl amine (186.0 g, 1 mol, 2.0 equiv.) was gradually added diglycolic acid (67.1 g, 0.5 mol, 1.0 equiv.) at room temperature. The reaction mixture was then stirred overnight at the same temperature. Subsequently, the RBF was placed in an oil bath over a hot plate, and the ethanol was distilled off and recovered at 85 °C. The flask was outfitted with an air condenser (20 cm) and flushed with industrial-grade N<sub>2</sub> for 10 minutes at 100 ccm. The temperature of the reaction was then raised to 200 °C, and the mixture was stirred for 24 hours under 100 ccm N<sub>2</sub> flow at the same temperature. Upon cooling to room temperature, TEHDGA (221 g in 88% purity) was obtained as a pale-yellow oil.

### 2.4 Substrate Scope Studies

**2,2'-oxybis(N,N-dihexylacetamide) 4a.** The reaction was carried out on the 50 mmol scale using the corresponding ammonium salt (25.30 g) at 200 °C for 24 hours. **4a** was obtained in 90% yield as a pale yellow oil. <sup>1</sup>H NMR (400 MHz, CDCl<sub>3</sub>) δ 4.30 (s, 4H), 3.33 – 3.25 (m, 4H), 3.21 – 3.14 (m, 4H), 1.57 – 1.46 (m, 8H), 1.35 – 1.22 (m, 24H), 0.93 – 0.84 (m, 12H). <sup>13</sup>C NMR (101 MHz, CDCl<sub>3</sub>) δ 168.5, 69.1, 46.9, 45.7, 31.6, 31.5, 28.9, 27.5, 26.7, 26.5, 22.57, 22.55, 14.0, 13.9. HRMS: Calculated for C<sub>28</sub>H<sub>57</sub>N<sub>2</sub>O<sub>3</sub> (M+H<sup>+</sup>): 469.4369; Found: 469.4361.

**2,2'-oxybis(N,N-dibutylacetamide) (4b).** The reaction was carried out on the 31 mmol scale using the corresponding ammonium salt (18.00 g) at 200 °C for 24 hours. To achieve complete conversion, additional dibutyl amine (15.5 mmol, 0.5 equiv.) was introduced and the reaction mixture was stirred at 200 °C for another 12 hours. **4b** was obtained in 89% yield as a pale yellow oil. <sup>1</sup>H NMR (600 MHz, CDCl<sub>3</sub>) δ 4.30 (s, 4H), 3.33 – 3.28 (m, 4H), 3.21 – 3.16 (m, 4H), 1.54 – 1.47 (m, 8H), 1.34 – 1.26 (m, 8H), 0.96 – 0.88 (m, 12H). <sup>13</sup>C NMR (151 MHz, CDCl<sub>3</sub>) δ 168.4, 69.0, 46.6, 45.4, 30.9, 29.6, 20.1, 19.9, 13.8, 13.7. HRMS: Calculated for C<sub>20</sub>H<sub>41</sub>N<sub>2</sub>O<sub>3</sub> (M+H<sup>+</sup>): 357.3117; Found: 357.3110.

**2,2'-oxybis(N,N-dioctylacetamide) (4c).** The reaction was carried out on the 300 mmol scale using the corresponding ammonium salt (185.0 g) and one-pot synthesis method at 200 °C for 24 hours. **4c** was obtained in 93% yield as a pale yellow oil. <sup>1</sup>H NMR (400 MHz, CDCl<sub>3</sub>) δ 4.30 (s, 4H), 3.32 – 3.26 (m, 4H), 3.21 – 3.15 (m, 4H), 1.58 – 1.46 (m, 8H), 1.33 – 1.20 (m, 44H), 0.92 –

0.83 (m, 12H).  $^{13}\text{C}$  NMR (151 MHz,  $\text{CDCl}_3$ )  $\delta$  168.41, 69.03, 46.87, 45.72, 31.74, 31.69, 29.30, 29.25, 29.18, 29.14, 28.89, 27.53, 26.97, 26.77, 22.57, 22.55, 14.01, 14.00. HRMS: Calculated for  $\text{C}_{36}\text{H}_{73}\text{N}_2\text{O}_3$  ( $\text{M}+\text{H}^+$ ): 581.5621; Found: 581.5611.

**2,2'-oxybis(N-methyl-N-octylacetamide) (4d).** The reaction was carried out on the 15 mmol scale using the corresponding ammonium salt (6.4 g) at 200 °C for 24 hours. **4d** was obtained in 95% yield as a pale brown oil.  $^1\text{H}$  NMR (400 MHz,  $\text{CDCl}_3$ )  $\delta$  4.31 (s, 2H), 4.29 (s, 2H), 3.38 – 3.30 (m, 2H), 3.27 – 3.18 (m, 2H), 2.96 (s, 3H), 2.92 (s, 3H), 1.59 – 1.46 (m, 4H), 1.34 – 1.20 (m, 20H), 0.92 – 0.84 (m, 6H).  $^{13}\text{C}$  NMR (151 MHz,  $\text{CDCl}_3$ )  $\delta$  168.69, 168.63, 168.47, 168.40, 69.47, 69.35, 69.11, 68.95, 48.93, 47.81, 34.09, 33.08, 31.71, 31.66, 29.28, 29.24, 29.14, 29.10, 28.26, 27.00, 26.75, 26.59, 22.55, 22.53, 14.00, 13.98. HRMS: Calculated for  $\text{C}_{22}\text{H}_{45}\text{N}_2\text{O}_3$  ( $\text{M}+\text{H}^+$ ): 385.3430; Found: 385.3413.

**2,2'-oxybis(N,N-didecylacetamide) (4e).** The reaction was carried out on the 8.8 mmol scale using the corresponding ammonium salt (6.50 g) at 200 °C for 24 hours. **4e** was obtained in 87% yield as a colorless oil.  $^1\text{H}$  NMR (400 MHz,  $\text{CDCl}_3$ )  $\delta$  4.30 (s, 4H), 3.32 – 3.24 (m, 4H), 3.22 – 3.12 (m, 4H), 1.56 – 1.46 (m, 8H), 1.32 – 1.20 (m, 56H), 0.91 – 0.84 (m, 3H).  $^{13}\text{C}$  NMR (101 MHz,  $\text{CDCl}_3$ )  $\delta$  168.5, 69.1, 46.9, 45.8, 31.88, 31.86, 29.59, 29.55, 29.51, 29.41, 29.37, 29.30, 29.28, 28.9, 27.6, 27.0, 26.8, 22.7, 14.1. HRMS: Calculated for  $\text{C}_{44}\text{H}_{89}\text{N}_2\text{O}_3$  ( $\text{M}+\text{H}^+$ ): 693.6873; Found: 693.6848.

**2,2'-oxybis(N,N-didodecylacetamide) (4f).** The reaction was carried out on the 7.3 mmol scale using the corresponding ammonium salt (6.20 g) at 200 °C for 24 hours. **4f** was obtained in 88% yield as a colorless oil.  $^1\text{H}$  NMR (600 MHz,  $\text{CDCl}_3$ )  $\delta$  4.29 (s, 4H), 3.31 – 3.23 (m, 4H), 3.20 – 3.14 (m, 4H), 1.55 – 1.47 (m, 8H), 1.32 – 1.20 (m, 72H), 0.90 – 0.85 (m, 12H).  $^{13}\text{C}$  NMR (151 MHz,  $\text{CDCl}_3$ )  $\delta$  168.4, 69.1, 46.9, 45.8, 31.9, 29.63, 29.62, 29.60, 29.59, 29.58, 29.5, 29.40, 29.36, 29.3, 28.9, 27.6, 27.0, 26.8, 22.7, 14.1. HRMS: Calculated for  $\text{C}_{52}\text{H}_{105}\text{N}_2\text{O}_3$  ( $\text{M}+\text{H}^+$ ): 805.8125; Found: 805.8132.

**2,2'-oxybis(1-(piperidin-1-yl)ethan-1-one) (4g).** The reaction was carried out on the 39.4 mmol scale using the corresponding ammonium salt (12.00 g) at 200 °C for 24 hours. To achieve

complete conversion, additional piperidine (19.7 mmol, 0.5 equiv.) was introduced and the reaction mixture was stirred at 200 °C for another 12 hours. **4g** was obtained in 85% yield as a white solid. <sup>1</sup>H NMR (600 MHz, CDCl<sub>3</sub>) δ 4.26 – 4.24 (m, 4H), 3.54 – 3.48 (m, 4H), 3.39 – 3.34 (m, 4H), 1.64 – 1.58 (m, 4H), 1.56 – 1.50 (m, 8H). <sup>13</sup>C NMR (151 MHz, CDCl<sub>3</sub>) δ 166.93, 69.71, 45.82, 42.75, 26.32, 25.46, 24.37. HRMS: Calculated for C<sub>14</sub>H<sub>25</sub>N<sub>2</sub>O<sub>3</sub> (M+H<sup>+</sup>): 269.1865; Found: 269.1857.

**2,2'-oxybis(N,N-bis(2-ethylhexyl)acetamide) (4h).** The reaction was carried out on the 200 mmol scale using the corresponding ammonium salt (123.60 g) at 200 °C for 24 hours. 1,3,5-Trimethoxybenzene was added as an internal standard to verify the NMR yield. **4h** was obtained in 96% yield as a pale brown oil. <sup>1</sup>H NMR (400 MHz, CDCl<sub>3</sub>) δ 4.33 (s, 4H), 3.41 – 3.17 (m, 4H), 3.10 (s, 2H), 3.08 (s, 2H), 1.71 – 1.62 (m 4H), 1.60 – 1.50 (m, 4H), 1.32 – 1.16 (m, 32H), 0.93 – 0.81 (m, 24H). <sup>13</sup>C NMR (151 MHz, CDCl<sub>3</sub>) δ 169.5, 69.14, 49.9, 47.8, 37.8, 36.6, 30.5, 30.4, 28.77, 28.76, 28.65, 28.64, 23.74, 23.70, 23.04, 22.96, 14.03, 13.98, 10.9, 10.6, 10.54. HRMS: Calculated for C<sub>36</sub>H<sub>73</sub>N<sub>2</sub>O<sub>3</sub> (M+H<sup>+</sup>): 581.5621; Found: 581.5610.

**2-(2-(bis(2-methoxyethyl)amino)-2-oxoethoxy)-N-(2-methoxyethyl)-N-(3-methoxypropyl)acetamide (4i).** The reaction was carried out on the 47 mmol scale using the corresponding ammonium salt (19.00 g) at 200 °C for 24 hours. **4i** was obtained in 90% yield as a pale yellow oil. <sup>1</sup>H NMR (400 MHz, CDCl<sub>3</sub>) δ 4.37 (s, 4H), 3.60 – 3.45 (m, 16H), 3.32 (s, 6H), 3.31 (s, 6H). <sup>13</sup>C NMR (101 MHz, CDCl<sub>3</sub>) δ 169.6, 71.0, 70.7, 69.4, 59.0, 58.8, 47.9, 46.1. HRMS: Calculated for C<sub>16</sub>H<sub>33</sub>N<sub>2</sub>O<sub>3</sub> (M+H<sup>+</sup>): 365.2288; Found: 365.2278.



### 3. Life Cycle Analysis (LCA)

**Table S1.** Life cycle inventory for 1 kg Diglycolic Acid Production.

| Material/ Energy       | Value     | Unit | Unit process                                                                             |
|------------------------|-----------|------|------------------------------------------------------------------------------------------|
| Diglycol               | 0.8071885 | kg   | Diethylene glycol, at plant/US- US-EI U                                                  |
| HNO <sub>3</sub> (56%) | 2.8784648 | kg   | Nitric acid, in water (60% HNO <sub>3</sub> ) (NPK 13.2-0-0), at plant {RNA} Economic, S |
| Natural Gas            | 0.2577909 | MJ   | Natural gas, burned in power plant/US US-EI U                                            |

**Table S2.** Life cycle inventory for 1 kg Furfural Production.

| Material/ Energy | Value     | Unit | Unit process                                                  |
|------------------|-----------|------|---------------------------------------------------------------|
| Cornchop         | 1.3623978 | kg   | Maize chop {RoW}<br>  market for maize chop   APOS, S         |
| Water            | 0.0928883 | kg   | Water, ultrapure {RoW}  market for water, ultrapure   APOS, S |
| Natural Gas      | 0.2102047 | MJ   | Natural gas, burned in power plant/US US-EI U                 |

**Table S3.** Life cycle inventory for 1 kg 1-Octanol Production.

| Material/ Energy | Value     | Unit | Unit process                                                                       |
|------------------|-----------|------|------------------------------------------------------------------------------------|
| Furfural         | 0.0109793 | kg   | Furfural                                                                           |
| Acetone          | 0.0439171 | kg   | Acetone, liquid {RoW}  market for acetone, liquid   APOS, S                        |
| Acetic acid      | 0.5764126 | kg   | Acetic anhydride {GLO}  market for acetic anhydride   APOS, S                      |
| Sodium hydroxide | 0.3071316 | kg   | Sodium hydroxide, without water, in 50% solution state {GLO}  market for   APOS, S |
| Electricity      | 24.209328 | kWh  | Electricity, low voltage, at grid, Iowa/US US-EI U                                 |
| Natural Gas      | 0.304095  | MJ   | Natural gas, burned in power plant/US US-EI U                                      |

**Table S4.** Life cycle inventory for 1 kg Dioctylamine Production.

| Material/ Energy | Value     | Unit | Unit process                                          |
|------------------|-----------|------|-------------------------------------------------------|
| 1-Octanol        | 1.078688  | kg   | 1-Octanol                                             |
| Ammonia          | 0.0705334 | kg   | Ammonia, steam reforming, liquid, at plant/US-US-EI U |
| Natural Gas      | 0.3606187 | MJ   | Natural gas, burned in power plant/US US-EI U         |

**Table S5.** Life cycle inventory for 1 kg TODGA (New method) Production.

| Material/ Energy | Value     | Unit | Unit process                                                                      |
|------------------|-----------|------|-----------------------------------------------------------------------------------|
| Diglycolic acid  | 0.2480307 | kg   | Diglycolic Acid                                                                   |
| Dioctylamine     | 0.8938732 | kg   | Dioctylamine                                                                      |
| Nitrogen         | 0.3333356 | kg   | Nitrogen, via cryogenic air separation, production mix, at plant, gaseous EU-27 S |
| Silicone oil     | 0.0035909 | kg   | Silicone product, at plant/US- US-EI U                                            |
| Electricity      | 2.267264  | kWh  | Electricity, low voltage, at grid, Iowa/US US-EI U                                |

**Table S6.** Life cycle inventory for 1 kg Diglycolyl Chloride Production.

| Material/ Energy          | Value     | Unit | Unit process                                                  |
|---------------------------|-----------|------|---------------------------------------------------------------|
| Diglycolic acid           | 0.7837174 | kg   | Diglycolic acid                                               |
| Thionyl chloride          | 1.3916248 | kg   | Thionyl chloride {RoW}  market for thionyl chloride   APOS, S |
| Silicone oil              | 0.060858  | kg   | Silicone product, at plant/US- US-EI U                        |
| Tap water<br>(Condensing) | 180.69165 | kg   | Tap water {GLO}  market group for   APOS, S                   |
| Electricity               | 8.0628952 | kWh  | Electricity, low voltage, at grid, Iowa/US US-EI U            |

**Table S7.** Life cycle inventory for 1 kg TODGA (Traditional method) Production.

| Material/ Energy                                  | Value     | Unit | Unit process                                                                                                                              |
|---------------------------------------------------|-----------|------|-------------------------------------------------------------------------------------------------------------------------------------------|
| Diglycolic chloride                               | 0.3461134 | kg   | Diglycolyl chloride                                                                                                                       |
| Diocetylamine                                     | 1.0264494 | kg   | Diocetylamine                                                                                                                             |
| Diethyl ether                                     | 1.516336  | kg   | Diethyl ether, without water, in 99.95% solution state {RoW}  market for diethyl ether, without water, in 99.95% solution state   APOS, S |
| Sodium hydroxide                                  | 0.242915  | kg   | Sodium hydroxide, without water, in 50% solution state {GLO}  market for   APOS, S                                                        |
| Hydrogen chloride (HCl)                           | 0.5060729 | kg   | Hydrogen chloride gas, production mix for PVC production, at plant RER                                                                    |
| Sodium bicarbonate (NaHCO <sub>3</sub> )          | 0.9716599 | kg   | Sodium bicarbonate {GLO}  market for sodium bicarbonate   APOS, S                                                                         |
| Sodium chloride (Brine)                           | 5.0607287 | kg   | Sodium chloride, brine solution {GLO}  market for   APOS, S                                                                               |
| Water                                             | 80.97166  | kg   | Water, ultrapure {RoW}  market for water, ultrapure   APOS, S                                                                             |
| Sodium sulfate (Na <sub>2</sub> SO <sub>4</sub> ) | 5.0607287 | kg   | Sodium sulfate, anhydrite {RoW}  market for   APOS, S                                                                                     |
| Silica                                            | 4.048583  | kg   | Silica sand {GLO}  market for   APOS, S                                                                                                   |
| Hexane                                            | 8.0040486 | kg   | Hexane {GLO}  market for   APOS, S                                                                                                        |
| Ethyl acetate                                     | 2.7388664 | kg   | Ethyl acetate {GLO}  market for   APOS, S                                                                                                 |
| Electricity                                       | 4.3437247 | KWh  | Electricity, low voltage, at grid, Iowa/US US-EI U                                                                                        |
| Natural Gas                                       | 82.59871  | MJ   | Natural gas, burned in power plant/US US-EI U                                                                                             |

**Table S8.** Assumptions for new DGA synthesis system.

| Assumptions                                       | Value | Unit |
|---------------------------------------------------|-------|------|
| Insulation layer thickness                        | 0.04  | m    |
| Outer surface temperature of the insulation layer | 40    | °C   |

**Table S9.** Assumptions for traditional DGA synthesis system.

| Assumptions                                                             | Value | Unit  |
|-------------------------------------------------------------------------|-------|-------|
| Diglycolyl chloride yield rate                                          | 1     |       |
| Brine mass fraction                                                     | 50    | wt%   |
| Frequency of silica gel column use                                      | 10    | times |
| Ethyl acetate consumption to regenerate silica gel column               | 4500  | mL    |
| Ethyl acetate (for silica gel column regeneration) recycle rate         | 1     |       |
| Diethyl ether recycle rate                                              | 0.93  |       |
| Electricity use (for vacuum evaporation) scale up rate for unit product | 1     |       |

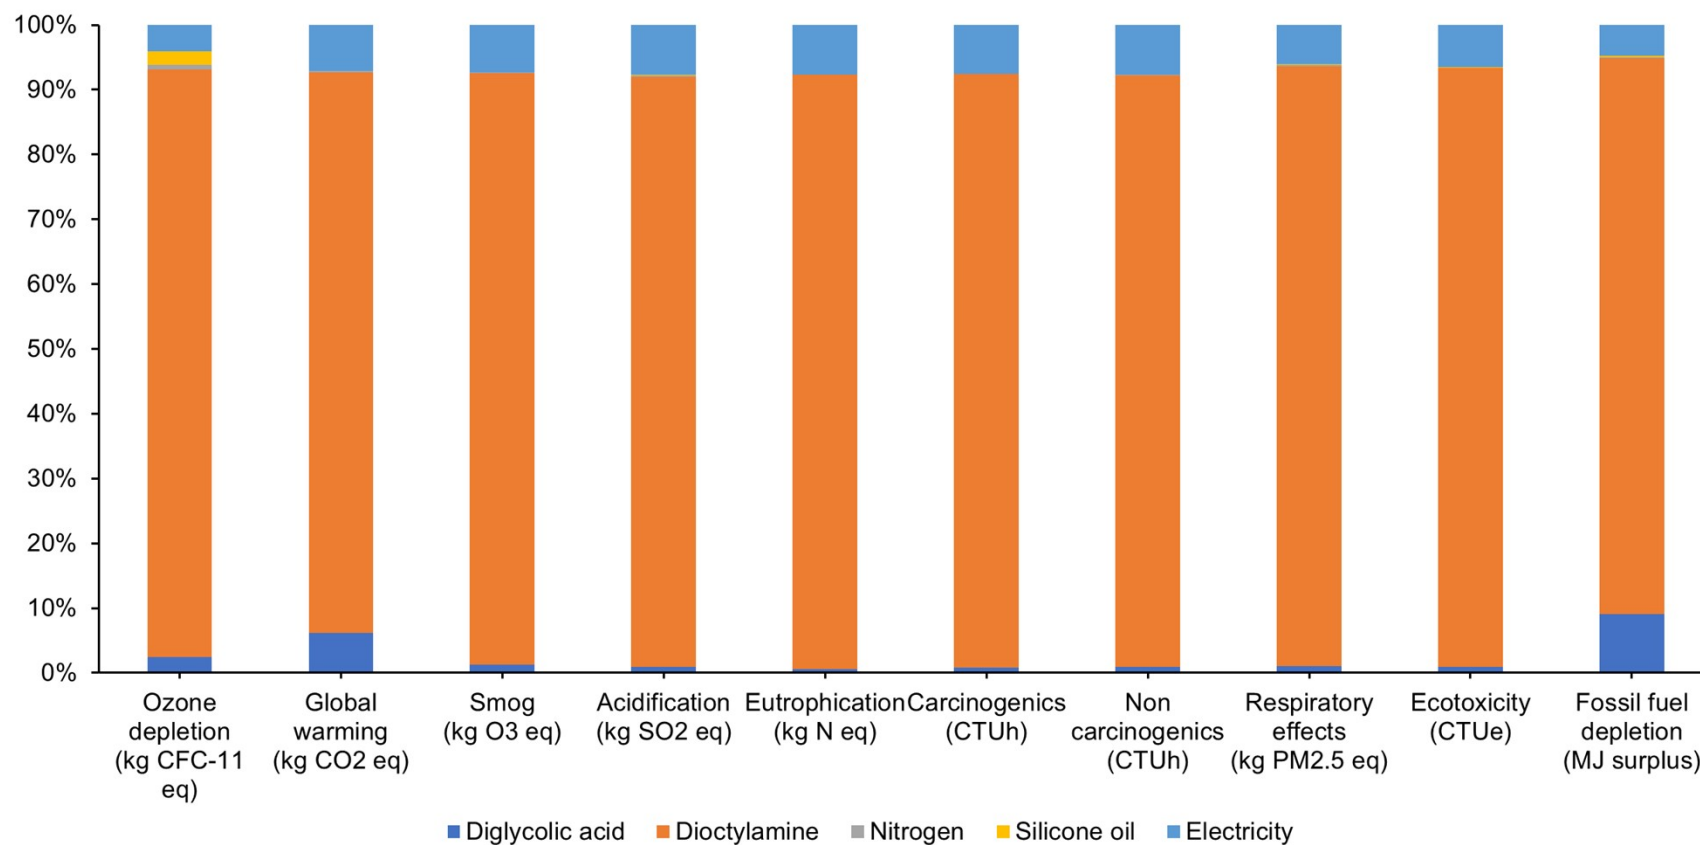

**Figure S2.** Contribution analysis on the TODGA synthesis via melt-amidation.

**Table S10.** Data for Figure S2.

| Percentage      | Ozone depletion<br>(kg CFC-11 eq) | Global warming<br>(kg CO <sub>2</sub> eq) | Smog<br>(kg O <sub>3</sub> eq) | Acidification<br>(kg SO <sub>2</sub> eq) | Eutrophication<br>(kg N eq) | Carcinogenics<br>(CTUh) | Non carcinogenics<br>(CTUh) | Respiratory effects<br>(kg PM2.5 eq) | Ecotoxicity<br>(CTUe) | Fossil fuel depletion<br>(MJ surplus) |
|-----------------|-----------------------------------|-------------------------------------------|--------------------------------|------------------------------------------|-----------------------------|-------------------------|-----------------------------|--------------------------------------|-----------------------|---------------------------------------|
| Diglycolic acid | 2.48%                             | 6.22%                                     | 1.27%                          | 0.96%                                    | 0.52%                       | 0.85%                   | 0.91%                       | 1.07%                                | 0.89%                 | 9.11%                                 |
| Diethylamine    | 90.93%                            | 87.08%                                    | 91.87%                         | 91.64%                                   | 92.44%                      | 92.19%                  | 91.96%                      | 93.01%                               | 93.05%                | 86.19%                                |
| Nitrogen        | 0.71%                             | 0.16%                                     | 0.11%                          | 0.22%                                    | 0.00%                       | 0.00%                   | 0.02%                       | 0.22%                                | 0.00%                 | 0.001262                              |
| Silicone oil    | 2.17%                             | 0.06%                                     | 0.07%                          | 0.10%                                    | 0.03%                       | 0.03%                   | 0.04%                       | 0.11%                                | 0.03%                 | 0.17%                                 |
| Electricity     | 3.71%                             | 6.48%                                     | 6.68%                          | 7.07%                                    | 7.01%                       | 6.92%                   | 7.07%                       | 5.59%                                | 6.02%                 | 4.40%                                 |

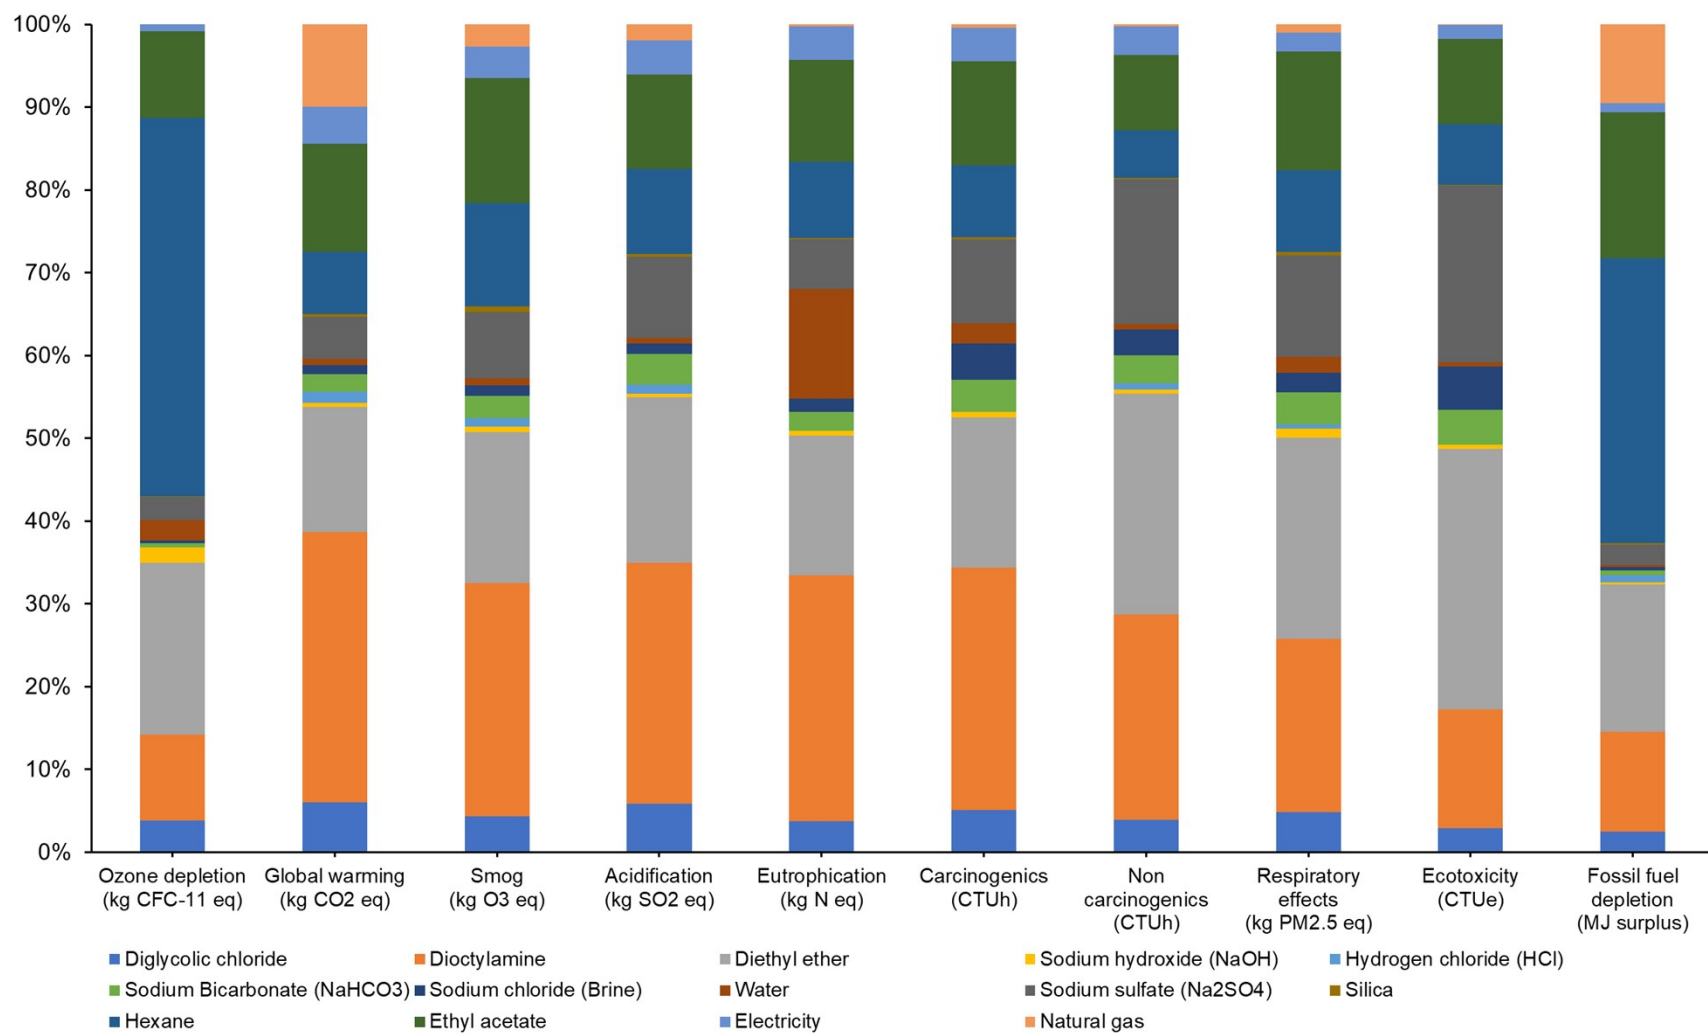

**Figure S3.** Contribution analysis on traditional TODGA synthesis method.

**Table S11.** Data for Figure S3.

| Percentage                                        | Ozone depletion<br>(kg CFC-11 eq) | Global warming<br>(kg CO <sub>2</sub> eq) | Smog<br>(kg O <sub>3</sub> eq) | Acidification<br>(kg SO <sub>2</sub> eq) | Eutrophication<br>(kg N eq) | Carcinogenics<br>(CTUh) | Non carcinogenics<br>(CTUh) | Respiratory effects<br>(kg PM2.5 eq) | Ecotoxicity<br>(CTUe) | Fossil fuel depletion<br>(MJ surplus) |
|---------------------------------------------------|-----------------------------------|-------------------------------------------|--------------------------------|------------------------------------------|-----------------------------|-------------------------|-----------------------------|--------------------------------------|-----------------------|---------------------------------------|
| Diglycolic chloride                               | 3.87%                             | 6.04%                                     | 4.32%                          | 5.87%                                    | 3.73%                       | 5.14%                   | 3.96%                       | 4.87%                                | 2.89%                 | 2.47%                                 |
| Diocetylamine                                     | 10.33%                            | 32.62%                                    | 28.16%                         | 29.08%                                   | 29.68%                      | 29.28%                  | 24.75%                      | 20.90%                               | 14.34%                | 12.03%                                |
| Diethyl ether                                     | 20.81%                            | 15.12%                                    | 18.27%                         | 19.97%                                   | 16.92%                      | 18.12%                  | 26.68%                      | 24.26%                               | 31.48%                | 17.88%                                |
| Sodium hydroxide (NaOH)                           | 1.78%                             | 0.53%                                     | 0.64%                          | 0.46%                                    | 0.54%                       | 0.65%                   | 0.53%                       | 1.18%                                | 0.54%                 | 0.19%                                 |
| Hydrogen chloride (HCl)                           | 0.00%                             | 1.30%                                     | 1.02%                          | 1.08%                                    | 0.05%                       | 0.03%                   | 0.75%                       | 0.44%                                | 0.00%                 | 0.90%                                 |
| Sodium Bicarbonate (NaHCO <sub>3</sub> )          | 0.54%                             | 2.10%                                     | 2.74%                          | 3.72%                                    | 2.31%                       | 3.86%                   | 3.36%                       | 3.91%                                | 4.20%                 | 0.56%                                 |
| Sodium chloride (Brine)                           | 0.37%                             | 1.09%                                     | 1.27%                          | 1.31%                                    | 1.58%                       | 4.39%                   | 3.15%                       | 2.37%                                | 5.23%                 | 0.41%                                 |
| Water                                             | 2.42%                             | 0.84%                                     | 0.84%                          | 0.61%                                    | 13.23%                      | 2.44%                   | 0.65%                       | 1.97%                                | 0.53%                 | 0.27%                                 |
| Sodium sulfate (Na <sub>2</sub> SO <sub>4</sub> ) | 2.76%                             | 5.05%                                     | 8.00%                          | 9.79%                                    | 6.02%                       | 10.14%                  | 17.41%                      | 12.20%                               | 21.28%                | 2.44%                                 |
| Silica                                            | 0.14%                             | 0.30%                                     | 0.66%                          | 0.36%                                    | 0.14%                       | 0.20%                   | 0.18%                       | 0.42%                                | 0.10%                 | 0.15%                                 |
| Hexane                                            | 45.70%                            | 7.52%                                     | 12.53%                         | 10.25%                                   | 9.15%                       | 8.70%                   | 5.78%                       | 9.88%                                | 7.37%                 | 34.41%                                |
| Ethyl acetate                                     | 10.48%                            | 13.12%                                    | 15.09%                         | 11.44%                                   | 12.31%                      | 12.58%                  | 9.08%                       | 14.33%                               | 10.29%                | 17.65%                                |
| Electricity                                       | 0.77%                             | 4.44%                                     | 3.75%                          | 4.11%                                    | 4.12%                       | 4.02%                   | 3.48%                       | 2.30%                                | 1.70%                 | 1.12%                                 |
| Natural gas                                       | 0.03%                             | 9.94%                                     | 2.73%                          | 1.94%                                    | 0.22%                       | 0.46%                   | 0.24%                       | 0.98%                                | 0.06%                 | 9.51%                                 |



**Table S12.** Data for Figure 1.

| Impact category       | Melt-amidation | Traditional Method |
|-----------------------|----------------|--------------------|
| Ozone depletion       | 9.89%          | 100%               |
| Global warming        | 32.62%         | 100%               |
| Smog                  | 26.69%         | 100%               |
| Acidification         | 27.64%         | 100%               |
| Eutrophication        | 27.96%         | 100%               |
| Carcinogenics         | 27.65%         | 100%               |
| Non carcinogenics     | 23.44%         | 100%               |
| Respiratory effects   | 19.57%         | 100%               |
| Ecotoxicity           | 13.42%         | 100%               |
| Fossil fuel depletion | 12.16%         | 100%               |

**Table S13** Data for Figure 2.

|                      | kg CO <sub>2</sub> eq                             | Melt-amidation | Traditional Method |
|----------------------|---------------------------------------------------|----------------|--------------------|
| Reactants            | Diglycolic acid                                   | 1.161502418    | 0                  |
|                      | Diglycolic chloride                               | 0              | 3.459949704        |
|                      | Dioctylamine                                      | 16.26356219    | 18.67571777        |
| Supporting materials | Silicone oil                                      | 0.012029999    | 0                  |
|                      | Nitrogen                                          | 0.029436981    | 0                  |
|                      | Diethyl ether                                     | 0              | 8.654488878        |
|                      | Sodium hydroxide (NaOH)                           | 0              | 0.305663808        |
|                      | Hydrogen chloride (HCl)                           | 0              | 0.741660071        |
|                      | Sodium Bicarbonate (NaHCO <sub>3</sub> )          | 0              | 1.201324626        |
|                      | Sodium chloride (Brine)                           | 0              | 0.623543009        |
|                      | Water                                             | 0              | 0.480496943        |
|                      | Sodium sulfate (Na <sub>2</sub> SO <sub>4</sub> ) | 0              | 2.889868337        |
|                      | Silica                                            | 0              | 0.169357154        |
|                      | Hexane                                            | 0              | 4.303921456        |
|                      | Ethyl acetate                                     | 0              | 7.510408922        |
| Energy               | Electricity                                       | 1.210332287    | 2.543027477        |
|                      | Natural gas                                       | 0              | 5.690642962        |

#### 4. Liquid-liquid Extraction Studies

*Manual Extraction:* A 0.75 mL of 7.0 mM Ln(III) (0.5 mM of each Ln(III)) in 3.0 M HCl was contacted with 0.75 mL organic phase containing 0.10 M DGA ligands in Isopar L/Exxal 13 that were pre-equilibrated with the 3.0 M HCl. The two phases were contacted by end-over-end rotation in individual 2 mL centrifuge tubes using a rotating wheel (Fisher Scientific) at 36 rpm at  $22.0 \pm 0.5$  °C for 1 hour. Following liquid-liquid contacting, the samples were subjected to centrifugation at 3500 rpm for 5 minutes to allow phase separation. All extraction experiments were triplicated independently and experimental uncertainties were calculated with error propagation from the ICP analysis. Each sample was then sampled, with 0.5 mL aliquots of the aqueous phases transferred to individual polypropylene tubes (15 mL) containing 2.5 mL of 4% HNO<sub>3</sub> for the elemental analysis using ICP-OES. Two samples of the initial lanthanide solution were also prepared for the elemental analysis.

*High-throughput Automated Extraction:* The automated extraction experiments were conducted using a Chemspeed SWING robotic system equipped with a four-needle dispense head (Figure S4, **B**) and four 10 ml syringe pumps (**G**). Each pump was individually calibrated for precise liquid transfer. Solid dispensing was facilitated by the dispensing unit (**C**), with the 14 lanthanide salts stored in separate storage units (**D**). To prepare the lanthanide stock solution, the 13 Ln salts were first dispensed into the 20 mL vial using unit **C**, followed by the addition of 3.0 M HCl (prepared manually) to prepare the 7.0 mM Ln(III) (0.5 mM of each Ln(III)). This solution was thoroughly mixed using a shaker unit (**J**) at 100 rpm for 5 minutes. Due to the high viscosity of neat DGA, the organic phase containing 0.10 M DGA ligand in the Isopar L/Exxal 13 mixture was prepared manually and pre-mixed with 3.0 M HCl. After preparing the stock solutions, 2.0 mL of Ln(III) stock solution and 2.0 mL of organic phase were transferred to a 15 mL centrifuge tube using unit **B**. The centrifuge tube was capped, and the two-phase solution was contacted by end-over-end rotation using a rotating wheel at 36 rpm at  $22.0 \pm 0.5$  °C for 1 hour. All extraction experiments (except for **4g** and **4i**) were triplicated independently and experimental uncertainties were calculated with error propagation from the ICP analysis. Subsequently, the samples were subjected to centrifugation at 3500 rpm for 5 minutes to separate the two phases. Each triplicate was then subsampled, with the upper layer organic phase (~2 mL) first removed, followed by transferring 1

mL aliquots of the aqueous phase into a new 15 mL centrifuge tube. 5 mL of 4% HNO<sub>3</sub> was transferred to the above centrifuge tube to dilute the sample for ICP analysis. Two samples of the initial lanthanide solution were also prepared in the same way for the elemental analysis.

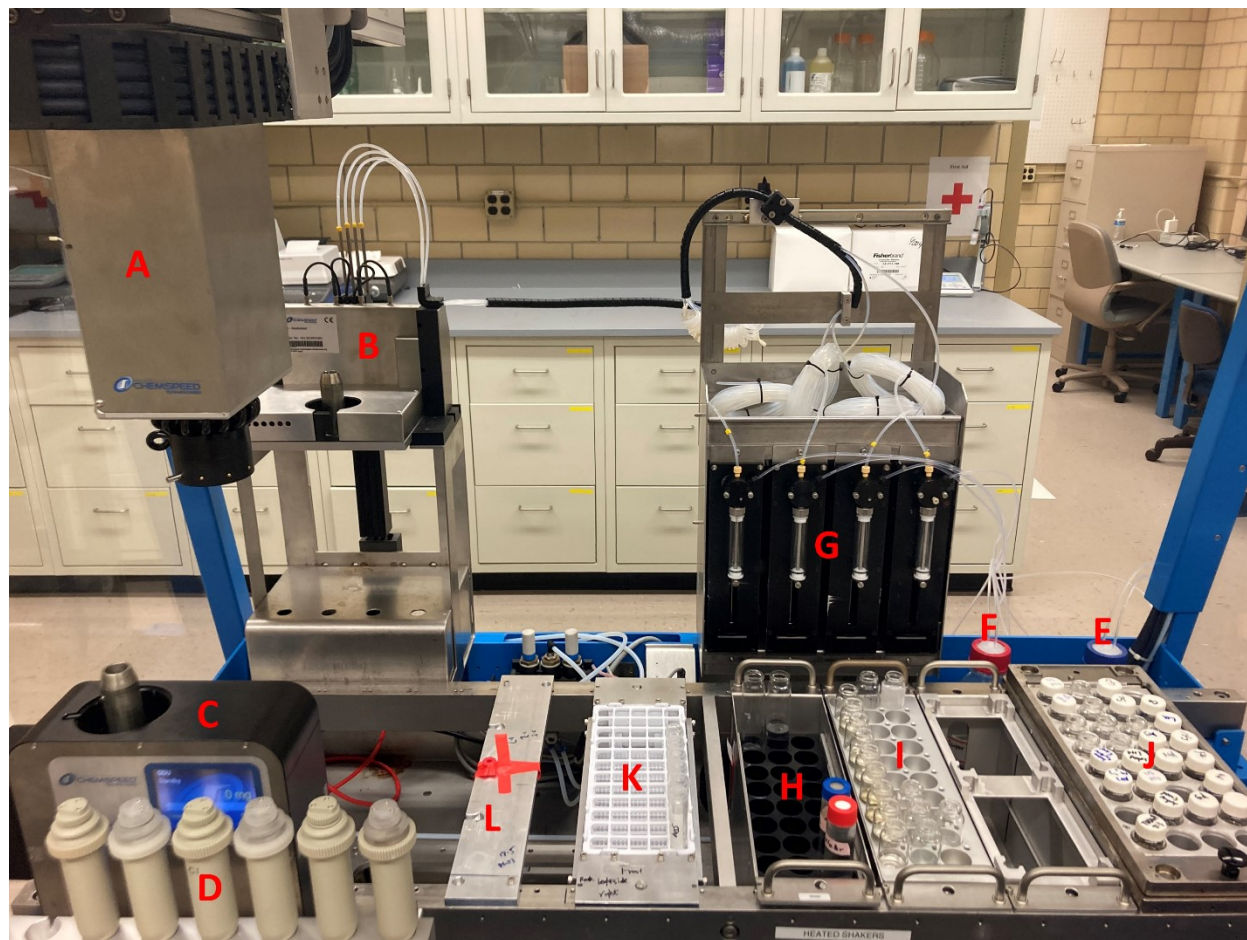

**Figure S4.** Details of the high-throughput extraction system. (A) Robotic arm. (B) Needlehead for dispensing and transferring liquids, equipped with four needles. (C) Solid dispensing unit. (D) Lanthanide metal salts storage units. (E) DI water storage bottle. (F) Isopar L and Exxal 13 storage bottle. (G) Syringe pumps (10 mL). (H) 50 mL vial rack. (I) 20 mL vial rack. (J) Shaker with heating unit. (K) ICP sampling rack. (L) Injection port.

*Stripping Studies:* After high-throughput extraction experiments, 1.5 mL of DGA-Ln enriched organic phase (upper layer) was transferred to a 15 mL centrifuge tube using unit B. Then 1.5 mL of a certain concentration of aqueous HCl solution was added to the above mixture and the two phases were contacted by end-over-end rotation using a rotating wheel (Fisher Scientific) at 36 rpm at  $22.0 \pm 0.5$  °C for 1 hour. Following liquid-liquid contacting, the samples were subjected to centrifugation at 3500 rpm for 5 minutes to allow phase separation. All extraction experiments

were triplicated independently and experimental uncertainties were calculated with error propagation from the ICP analysis. Each sample was then sampled, with 1.0 mL aliquots of the aqueous phases transferred to individual centrifuge tubes (15 mL) containing 5.0 mL of 4% HNO<sub>3</sub> for the elemental analysis using ICP-OES.

D values are calculated according to

$$[Ln]_{org} = [Ln]_{sample} - [Ln]_{aq}$$

$$D = \frac{[Ln]_{org}}{[Ln]_{aq}}$$

Extraction efficiencies (EE) are calculated according to

$$EE = \frac{[Ln]_{org}}{[Ln]_{sample}} \times 100$$

Stripping efficiencies (E<sub>s</sub>) are calculated according to

$$Es = \frac{[Ln]_{aq}^{Stripping}}{[Ln]_{org}} \times 100$$

## 5. Supplementary Data

**Table S14.** Plotting data for Figure 5a.

|         |             | La    | Ce    | Pr    | Nd    | Pm | Sm    | Eu    | Gd    | Tb    | Dy    | Ho    | Er    | Tm    | Yb    | Lu    |
|---------|-------------|-------|-------|-------|-------|----|-------|-------|-------|-------|-------|-------|-------|-------|-------|-------|
| TODGA-1 | E           | 13.04 | 30.74 | 51.06 | 53.33 | -- | 90.78 | 95.03 | 96.45 | 98.04 | 98.76 | 99.19 | 99.34 | 99.31 | 99.41 | 99.38 |
|         | uncertainty | 0.46  | 0.06  | 0.31  | 0.58  | -- | 0.27  | 0.20  | 0.15  | 0.10  | 0.08  | 0.07  | 0.06  | 0.06  | 0.06  | 0.06  |
| TODGA-3 | E           | 11.18 | 28.89 | 49.81 | 52.12 | -- | 90.58 | 94.96 | 96.42 | 98.05 | 98.80 | 99.23 | 99.37 | 99.35 | 99.45 | 99.42 |
|         | uncertainty | 0.75  | 1.14  | 1.29  | 1.65  | -- | 0.62  | 0.40  | 0.33  | 0.23  | 0.19  | 0.15  | 0.14  | 0.14  | 0.13  | 0.12  |
| TODGA-2 | E           | 13.82 | 33.64 | 50.73 | 52.90 | -- | 90.86 | 96.26 | 97.26 | 98.51 | 99.07 | 99.40 | 99.50 | 99.48 | 99.57 | 99.52 |
|         | uncertainty | 1.54  | 1.29  | 1.06  | 1.04  | -- | 0.23  | 0.11  | 0.10  | 0.06  | 0.04  | 0.03  | 0.02  | 0.02  | 0.02  | 0.02  |

**Table S15.** Plotting data for Figure 5b.

|                       |             | La    | Ce    | Pr   | Nd   | Pm | Sm   | Eu   | Gd   | Tb   | Dy   | Ho   | Er   | Tm   | Yb   | Lu   |
|-----------------------|-------------|-------|-------|------|------|----|------|------|------|------|------|------|------|------|------|------|
| TODGA-<br>Manual      | Log D       | -0.82 | -0.35 | 0.02 | 0.06 | -- | 0.99 | 1.28 | 1.43 | 1.70 | 1.90 | 2.09 | 2.18 | 2.16 | 2.23 | 2.20 |
|                       | uncertainty | 0.02  | 0.00  | 0.01 | 0.01 | -- | 0.01 | 0.02 | 0.02 | 0.02 | 0.03 | 0.04 | 0.04 | 0.04 | 0.04 | 0.04 |
| TODGA-<br>Automatic   | Log D       | -0.82 | -0.33 | 0.06 | 0.12 | -- | 1.07 | 1.36 | 1.50 | 1.77 | 1.97 | 2.16 | 2.24 | 2.23 | 2.31 | 2.27 |
|                       | uncertainty | 0.03  | 0.01  | 0.01 | 0.01 | -- | 0.01 | 0.01 | 0.00 | 0.01 | 0.00 | 0.01 | 0.01 | 0.01 | 0.01 | 0.00 |
| DMDODGA-<br>Manual    | Log D       | 0.28  | 0.60  | 0.93 | 1.06 | -- | 2.00 | 2.27 | 2.38 | 2.68 | 2.90 | 3.16 | 3.16 | 3.17 | 3.35 | 3.17 |
|                       | uncertainty | 0.02  | 0.02  | 0.02 | 0.02 | -- | 0.05 | 0.03 | 0.03 | 0.05 | 0.06 | 0.11 | 0.10 | 0.10 | 0.06 | 0.09 |
| DMDODGA-<br>Automatic | Log D       | 0.36  | 0.67  | 1.00 | 1.13 | -- | 2.01 | 2.29 | 2.41 | 2.71 | 2.93 | 3.14 | 3.16 | 3.17 | 3.29 | 3.16 |
|                       | uncertainty | 0.01  | 0.01  | 0.01 | 0.01 | -- | 0.02 | 0.01 | 0.01 | 0.01 | 0.02 | 0.05 | 0.07 | 0.07 | 0.09 | 0.04 |

**Table S16.** Plotting data for Figure 5c.

| Log D      | La    | Ce    | Pr    | Nd    | Pm | Sm   | Eu   | Gd   | Tb   | Dy   | Ho   | Er   | Tm   | Yb   | Lu   |
|------------|-------|-------|-------|-------|----|------|------|------|------|------|------|------|------|------|------|
| Sequential | -0.45 | -0.13 | 0.13  | 0.17  | -- | 0.99 | 1.26 | 1.38 | 1.64 | 1.82 | 1.98 | 2.07 | 2.05 | 2.11 | 2.10 |
| Direct     | -0.74 | -0.34 | -0.05 | -0.04 | -- | 0.83 | 1.11 | 1.26 | 1.52 | 1.73 | 1.89 | 2.00 | 1.99 | 2.05 | 2.05 |

**Table S17.** Plotting data for Figure 5d.

| Ratio of Isopar<br>L: Exxal 13 |       | La    | Ce    | Pr    | Nd    | Pm | Sm   | Eu   | Gd   | Tb   | Dy   | Ho   | Er   | Tm   | Yb   | Lu   |
|--------------------------------|-------|-------|-------|-------|-------|----|------|------|------|------|------|------|------|------|------|------|
| 9:1                            | Log D | -1.07 | -0.62 | -0.28 | -0.40 | -- | 0.53 | 0.83 | 0.99 | 1.26 | 1.48 | 1.66 | 1.76 | 1.74 | 1.79 | 1.81 |
|                                | error | 0.01  | 0.00  | 0.01  | 0.01  | -- | 0.02 | 0.02 | 0.02 | 0.02 | 0.02 | 0.02 | 0.02 | 0.02 | 0.02 | 0.02 |
| 7:3                            | Log D | -0.82 | -0.33 | 0.06  | 0.12  | -- | 1.07 | 1.36 | 1.50 | 1.77 | 1.97 | 2.16 | 2.24 | 2.23 | 2.31 | 2.27 |
|                                | error | 0.03  | 0.01  | 0.01  | 0.01  | -- | 0.01 | 0.01 | 0.00 | 0.01 | 0.00 | 0.01 | 0.01 | 0.01 | 0.01 | 0.00 |
| 5:5                            | Log D | -0.65 | -0.21 | 0.15  | 0.21  | -- | 1.12 | 1.43 | 1.56 | 1.84 | 2.06 | 2.25 | 2.33 | 2.32 | 2.39 | 2.35 |
|                                | error | 0.01  | 0.00  | 0.00  | 0.00  | -- | 0.00 | 0.00 | 0.00 | 0.00 | 0.00 | 0.01 | 0.01 | 0.00 | 0.01 | 0.00 |

**Table S18.** Plotting data for Figure 5e.

|           |             | La    | Ce    | Pr    | Nd    | Pm | Sm    | Eu    | Gd    | Tb    | Dy    | Ho    | Er    | Tm    | Yb    | Lu    |
|-----------|-------------|-------|-------|-------|-------|----|-------|-------|-------|-------|-------|-------|-------|-------|-------|-------|
| 0.1 M HCl | LogD        | -0.95 | -0.94 | -0.98 | -0.95 | -- | -0.96 | -0.91 | -0.92 | -0.91 | -0.90 | -0.87 | -0.84 | -0.85 | -0.84 | -0.80 |
|           | uncertainty | 0.10  | 0.11  | 0.15  | 0.13  | -- | 0.13  | 0.11  | 0.10  | 0.11  | 0.12  | 0.11  | 0.11  | 0.10  | 0.09  | 0.08  |
| 1.5 M HCl | LogD        | -0.89 | -0.67 | -0.66 | -0.82 | -- | -0.29 | -0.05 | 0.07  | 0.31  | 0.50  | 0.65  | 0.74  | 0.73  | 0.76  | 0.82  |
|           | uncertainty | 0.11  | 0.07  | 0.06  | 0.09  | -- | 0.03  | 0.01  | 0.01  | 0.01  | 0.01  | 0.01  | 0.01  | 0.00  | 0.00  | 0.00  |
| 3.0 M HCl | LogD        | -0.82 | -0.33 | 0.06  | 0.12  | -- | 1.07  | 1.36  | 1.50  | 1.77  | 1.97  | 2.16  | 2.24  | 2.23  | 2.31  | 2.27  |
|           | uncertainty | 0.03  | 0.01  | 0.01  | 0.01  | -- | 0.01  | 0.01  | 0.00  | 0.01  | 0.00  | 0.01  | 0.01  | 0.01  | 0.01  | 0.00  |

**Table S19.** Plotting data for Figure 5f.

|        |                              | La   | Ce   | Pr   | Nd   | Pm | Sm   | Eu   | Gd   | Tb   | Dy    | Ho    | Er    | Tm    | Yb    | Lu    |
|--------|------------------------------|------|------|------|------|----|------|------|------|------|-------|-------|-------|-------|-------|-------|
| TODGA  | E                            | 18.2 | 37.9 | 58.5 | 62.0 | -- | 93.0 | 96.4 | 97.3 | 98.6 | 99.1  | 99.4  | 99.5  | 99.5  | 99.6  | 99.6  |
|        | HCl uncertainty              | 0.2  | 0.2  | 0.2  | 0.3  | -- | 0.1  | 0.0  | 0.0  | 0.0  | 0.0   | 0.0   | 0.0   | 0.0   | 0.0   | 0.0   |
| TODGA  | E                            | 85.6 | 95.9 | 98.6 | 99.0 | -- | 99.8 | 99.9 | 99.9 | 99.9 | 100.0 | 100.0 | 100.0 | 100.0 | 100.0 | 100.0 |
|        | HNO <sub>3</sub> uncertainty | 1.4  | 0.4  | 0.2  | 0.1  | -- | 0.0  | 0.0  | 0.0  | 0.0  | 0.0   | 0.0   | 0.0   | 0.0   | 0.0   | 0.0   |
| TEHDGA | E                            | 5.0  | 8.5  | 10.1 | 8.8  | -- | 14.8 | 18.7 | 18.2 | 23.3 | 26.9  | 28.9  | 29.3  | 25.7  | 24.5  | 24.0  |
|        | HCl uncertainty              | 0.4  | 0.5  | 0.4  | 0.5  | -- | 1.2  | 0.4  | 0.4  | 0.4  | 0.4   | 0.4   | 0.4   | 0.4   | 0.4   | 0.4   |
| TEHDGA | E                            | 52.5 | 70.4 | 75.3 | 73.3 | -- | 84.1 | 88.6 | 90.9 | 94.9 | 96.7  | 97.5  | 97.8  | 97.6  | 97.5  | 97.4  |
|        | HNO <sub>3</sub> uncertainty | 2.0  | 1.4  | 1.2  | 1.3  | -- | 0.9  | 0.7  | 0.6  | 0.3  | 0.2   | 0.2   | 0.1   | 0.1   | 0.2   | 0.2   |

**Table S20.** Plotting data for Figure 6.

|           |             | La    | Ce    | Pr    | Nd    | Pm | Sm    | Eu    | Gd    | Tb    | Dy    | Ho    | Er    | Tm    | Yb    | Lu    |
|-----------|-------------|-------|-------|-------|-------|----|-------|-------|-------|-------|-------|-------|-------|-------|-------|-------|
| <b>4c</b> | LogD        | -0.82 | -0.33 | 0.06  | 0.12  | -- | 1.07  | 1.36  | 1.50  | 1.77  | 1.97  | 2.16  | 2.24  | 2.23  | 2.31  | 2.27  |
|           | uncertainty | 0.03  | 0.01  | 0.01  | 0.01  | -- | 0.01  | 0.01  | 0.00  | 0.01  | 0.00  | 0.01  | 0.01  | 0.01  | 0.01  | 0.00  |
| <b>4h</b> | LogD        | -1.47 | -1.25 | -1.21 | -1.29 | -- | -0.99 | -0.88 | -0.85 | -0.72 | -0.64 | -0.58 | -0.58 | -0.63 | -0.66 | -0.66 |
|           | uncertainty | 0.09  | 0.07  | 0.07  | 0.07  | -- | 0.05  | 0.03  | 0.03  | 0.03  | 0.03  | 0.03  | 0.03  | 0.02  | 0.02  | 0.02  |
| <b>4d</b> | LogD        | 0.36  | 0.67  | 1.00  | 1.13  | -- | 2.01  | 2.29  | 2.41  | 2.71  | 2.93  | 3.14  | 3.16  | 3.17  | 3.29  | 3.16  |
|           | uncertainty | 0.01  | 0.01  | 0.01  | 0.01  | -- | 0.02  | 0.01  | 0.01  | 0.01  | 0.02  | 0.05  | 0.07  | 0.07  | 0.09  | 0.04  |
| <b>4g</b> | LogD        | -0.67 | -0.69 | -0.74 | -0.71 | -- | -0.73 | -0.68 | -0.69 | -0.74 | -0.76 | -0.75 | -0.77 | -0.74 | -0.71 | -0.66 |
|           |             | --    | --    | --    | --    | -- | --    | --    | --    | --    | --    | --    | --    | --    | --    | --    |
| <b>4i</b> | LogD        | -0.65 | -0.67 | -0.72 | -0.69 | -- | -0.70 | -0.65 | -0.65 | -0.71 | -0.73 | -0.72 | -0.74 | -0.71 | -0.67 | -0.62 |
|           |             | --    | --    | --    | --    | -- | --    | --    | --    | --    | --    | --    | --    | --    | --    | --    |



## 6. NMR and HRMS Spectra of Synthesized Diglycolamides

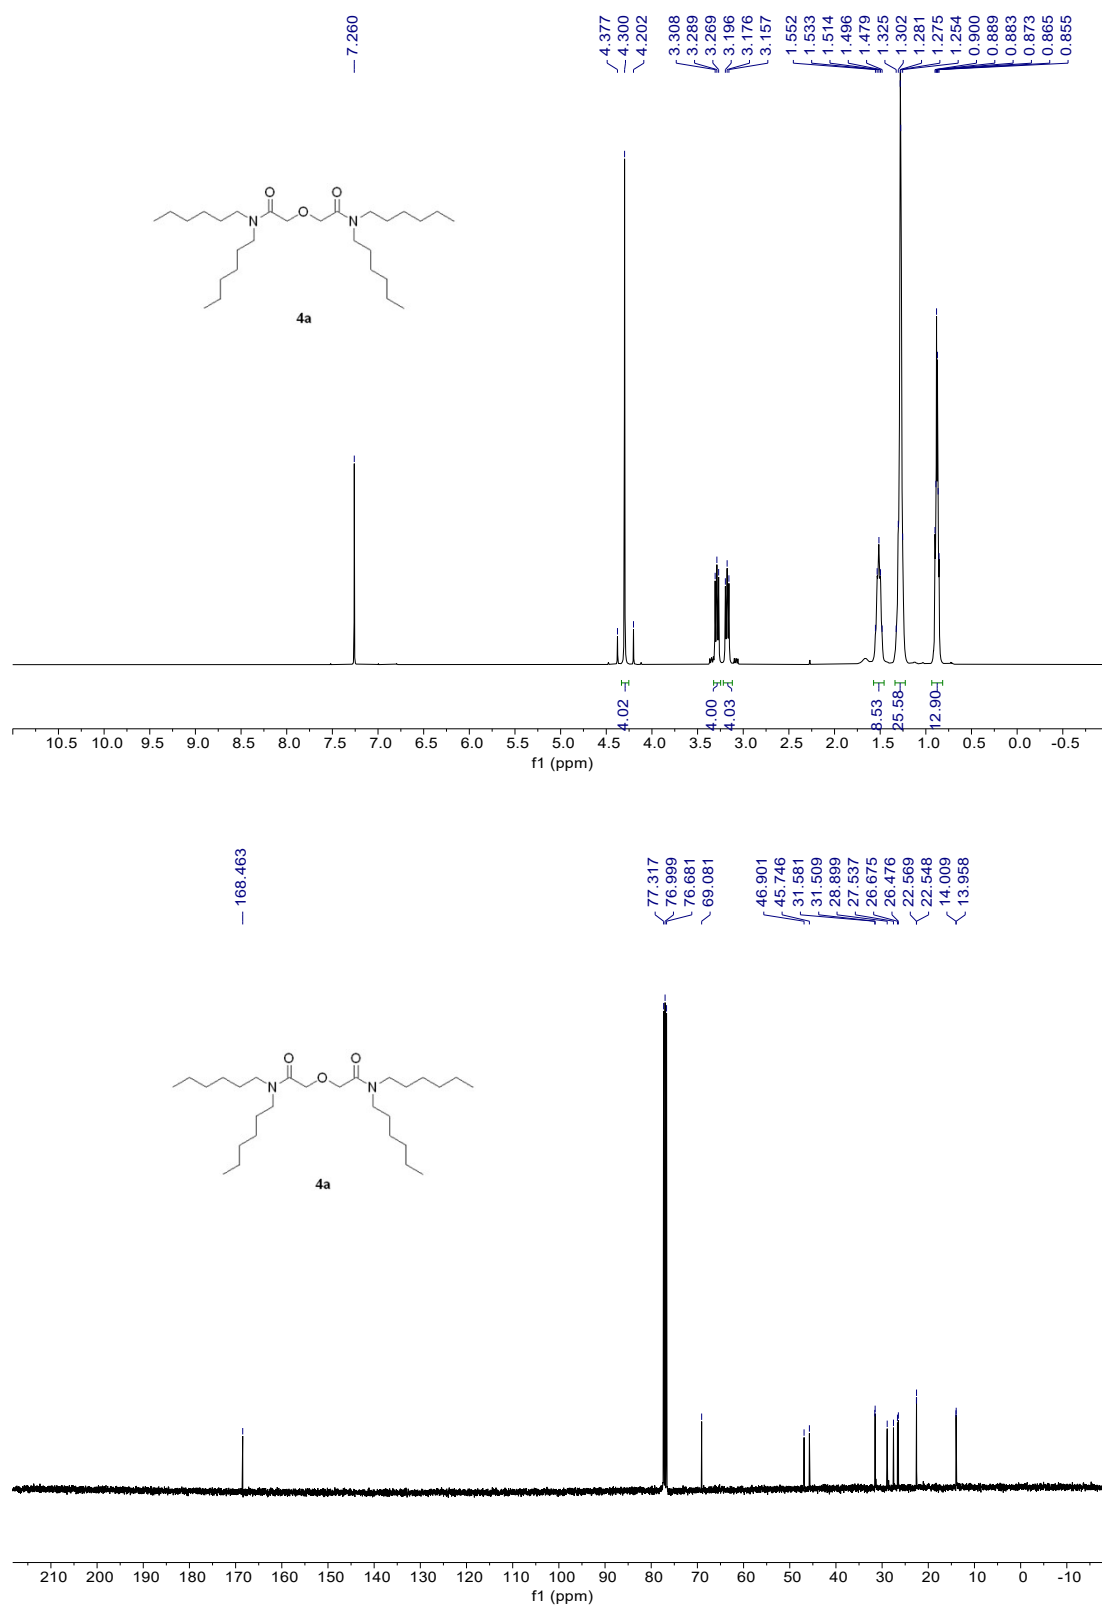

Figure S5.  $^1\text{H}$  NMR (600 MHz) and  $^{13}\text{C}$  NMR (151 MHz) spectra of compound 4a.

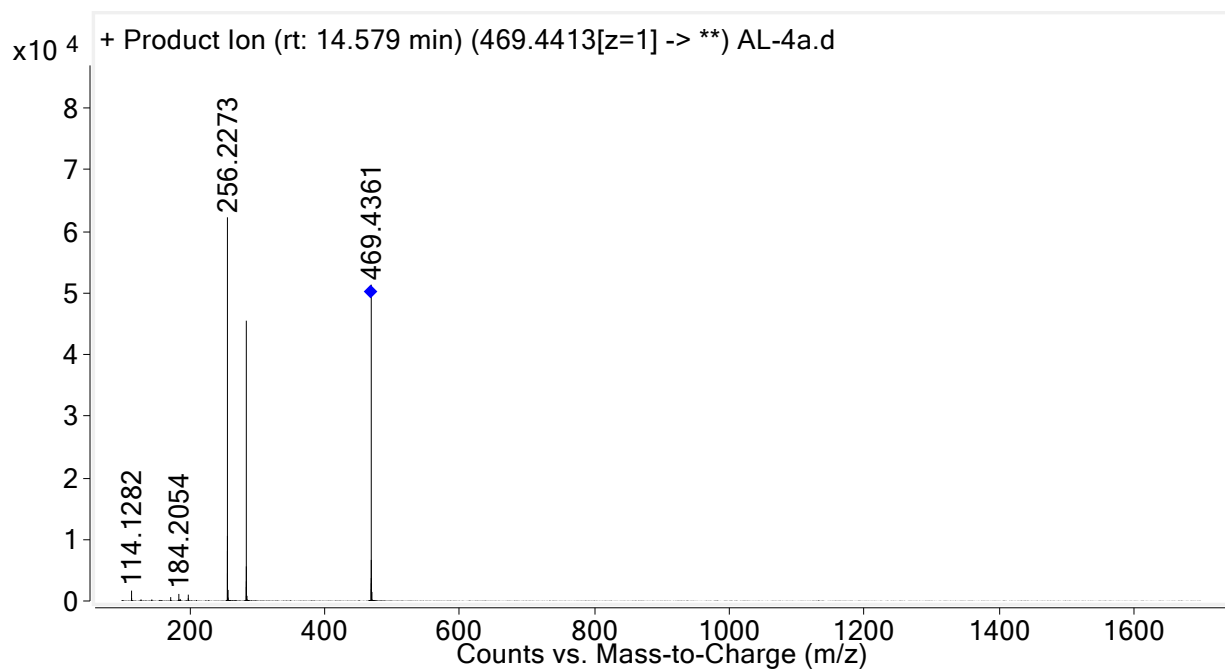

**Figure S6.** HRMS spectrum of compound **4a**.

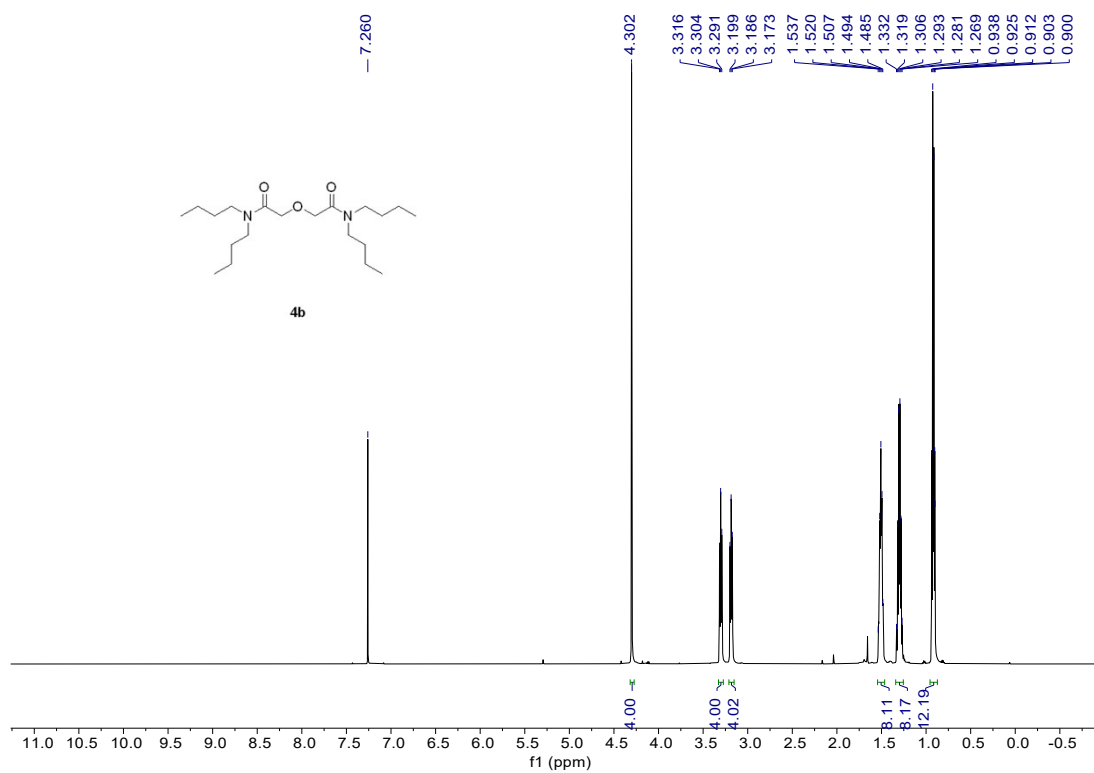

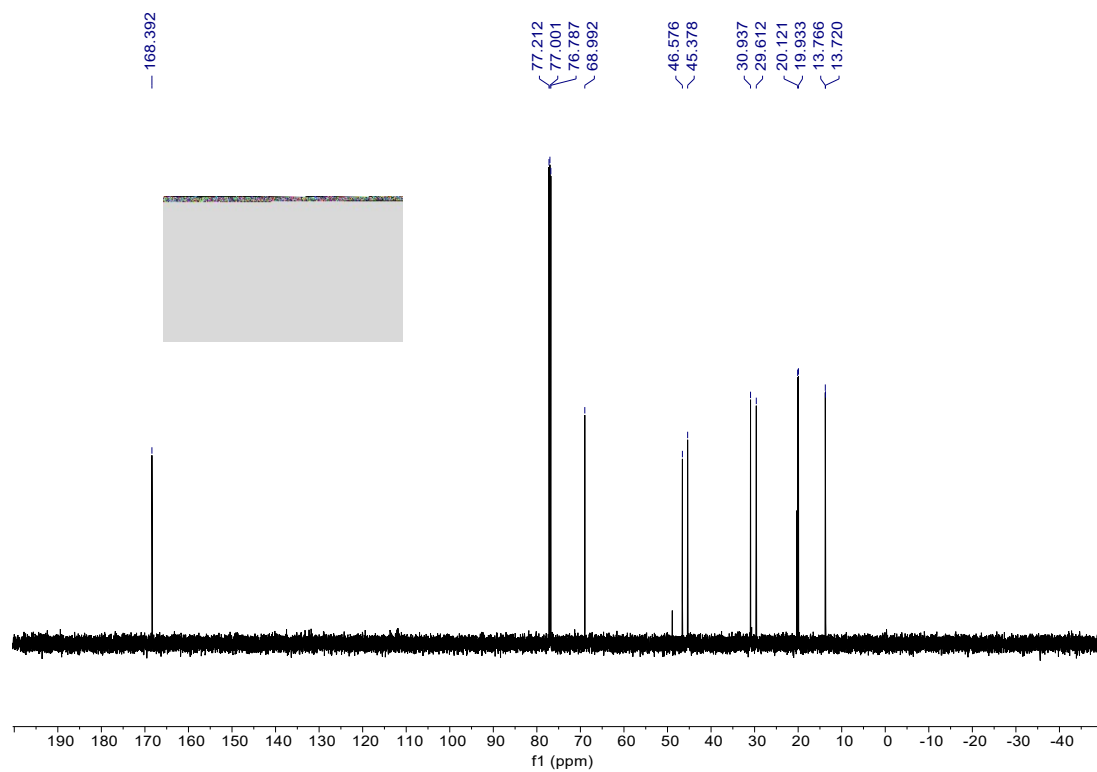

**Figure S7.**  $^1\text{H}$  NMR (600 MHz) and  $^{13}\text{C}$  NMR (151 MHz) spectra of compound **4b**.

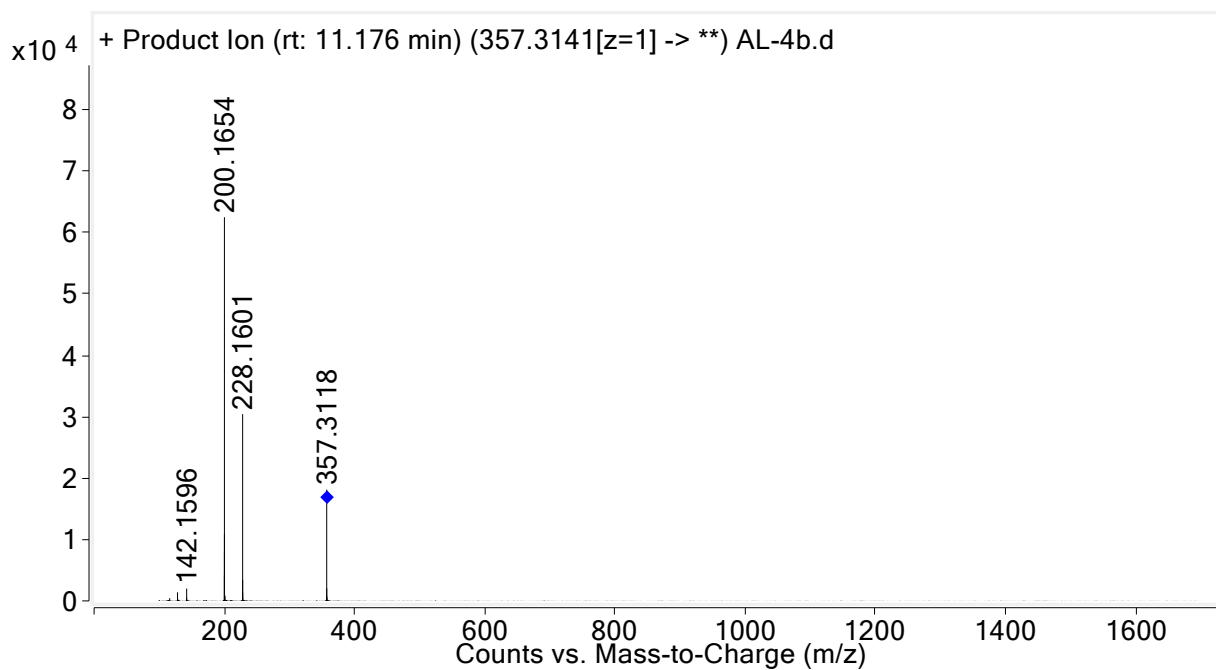

**Figure S8.** HRMS spectrum of compound **4b**.

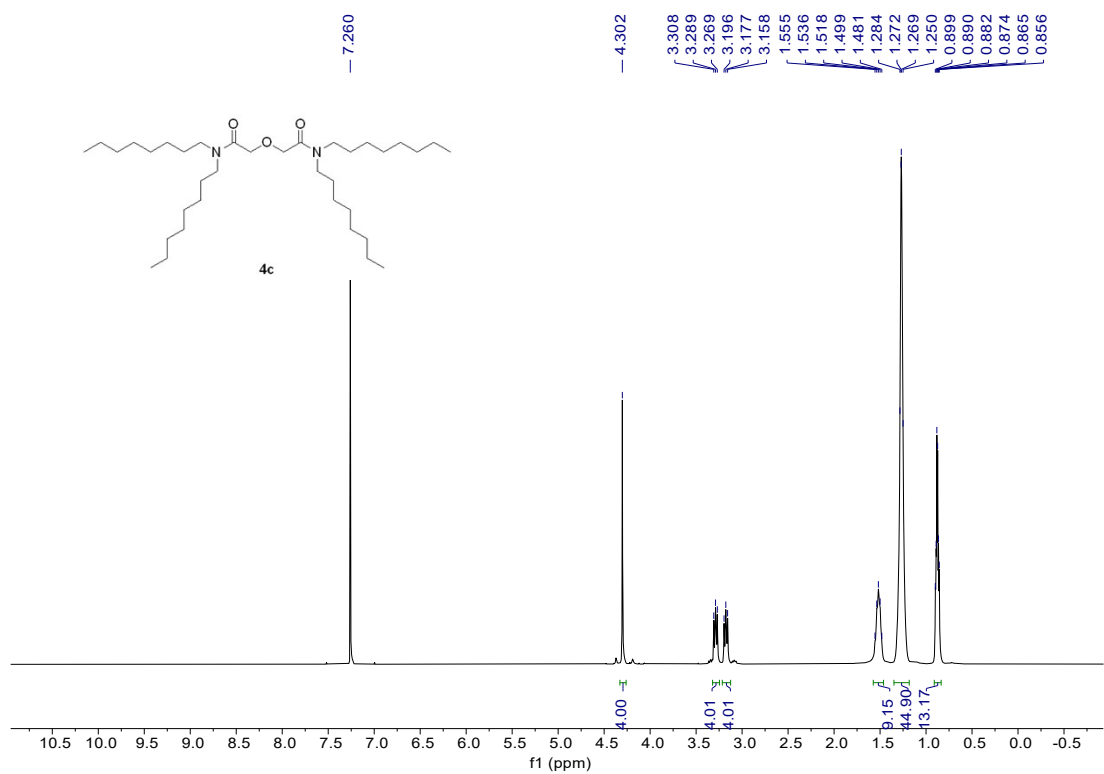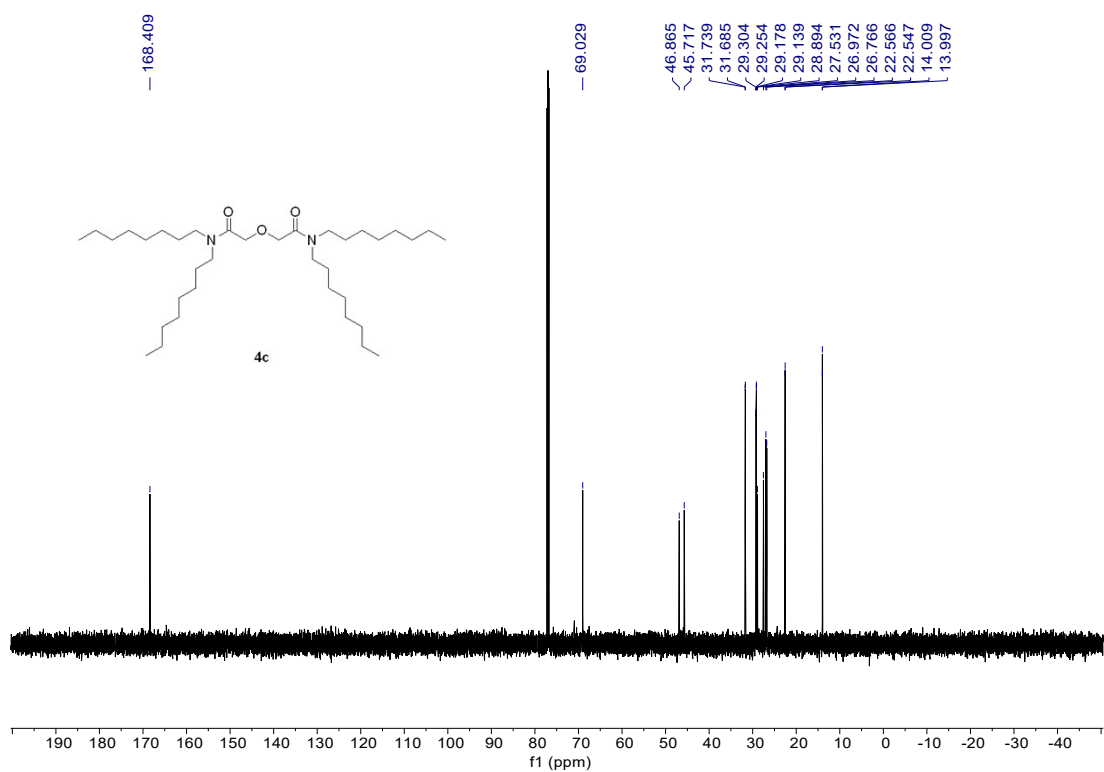

**Figure S9.**  $^1\text{H}$  NMR (600 MHz) and  $^{13}\text{C}$  NMR (151 MHz) spectra of compound **4c**.

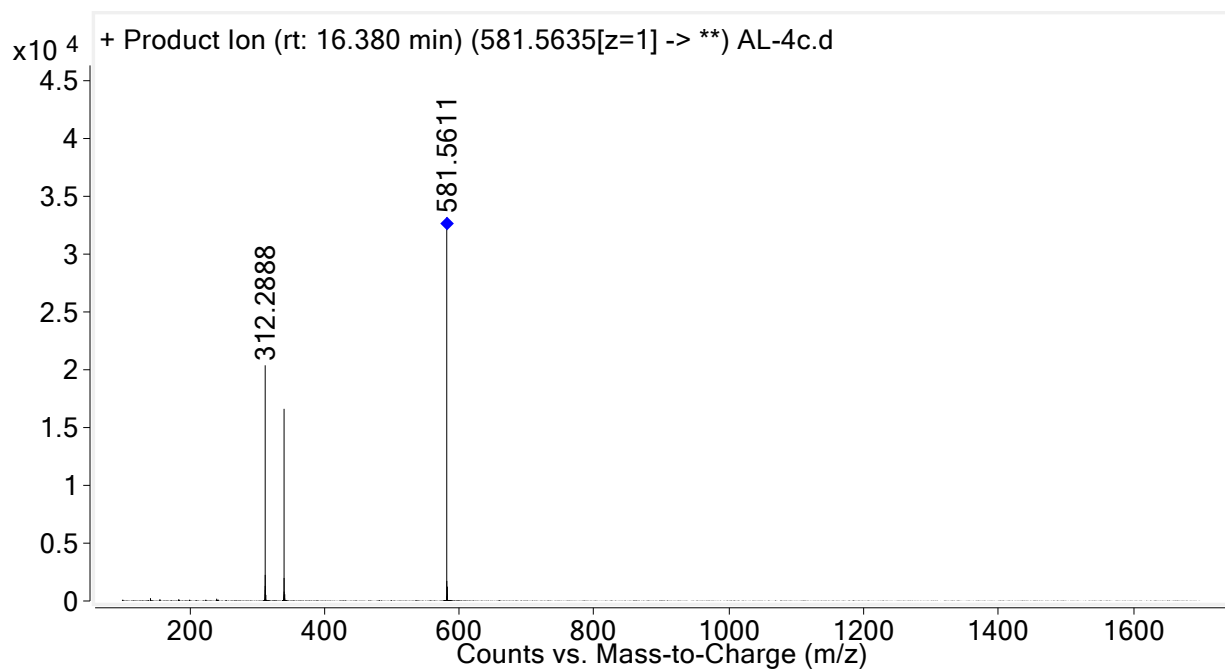

**Figure S10.** HRMS spectrum of compound **4c**.

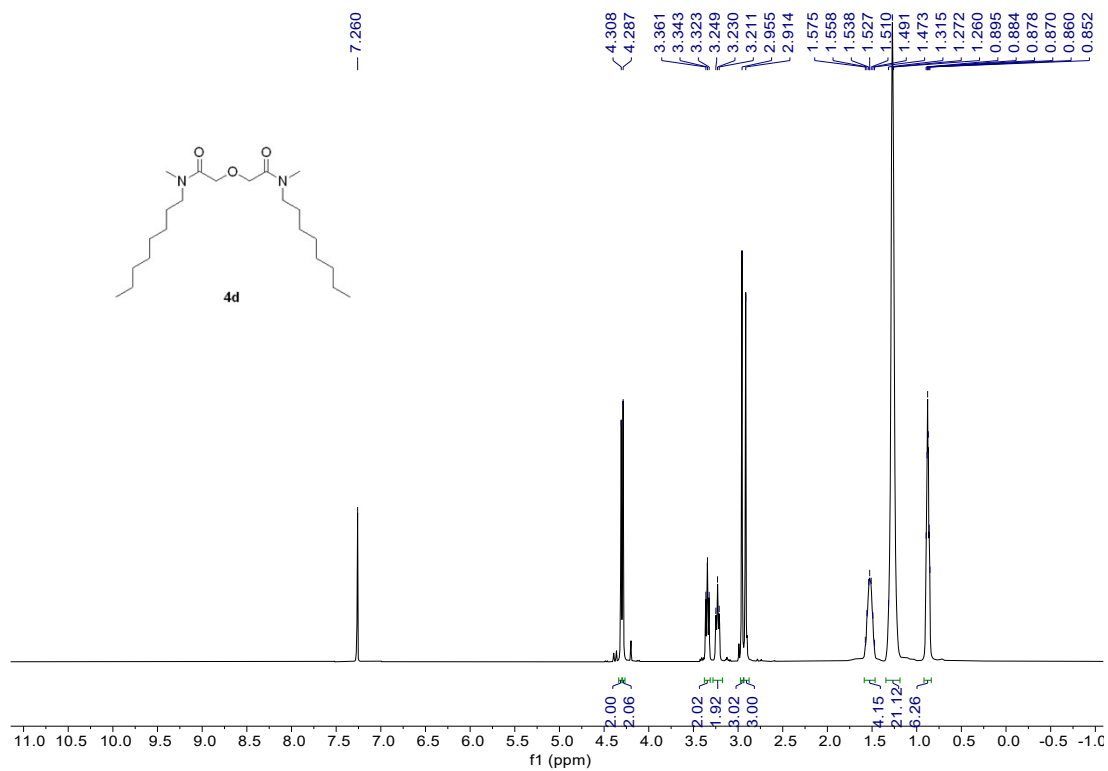

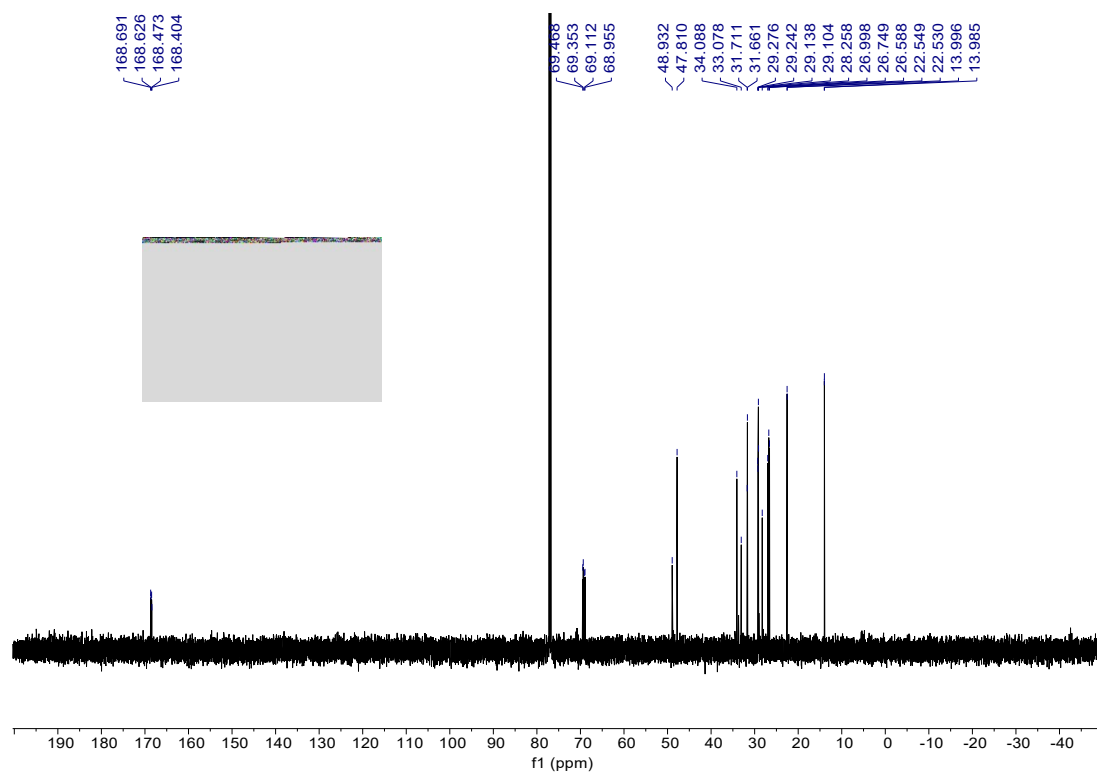

**Figure S11.**  $^1\text{H}$  NMR (600 MHz) and  $^{13}\text{C}$  NMR (151 MHz) spectra of compound **4d**.

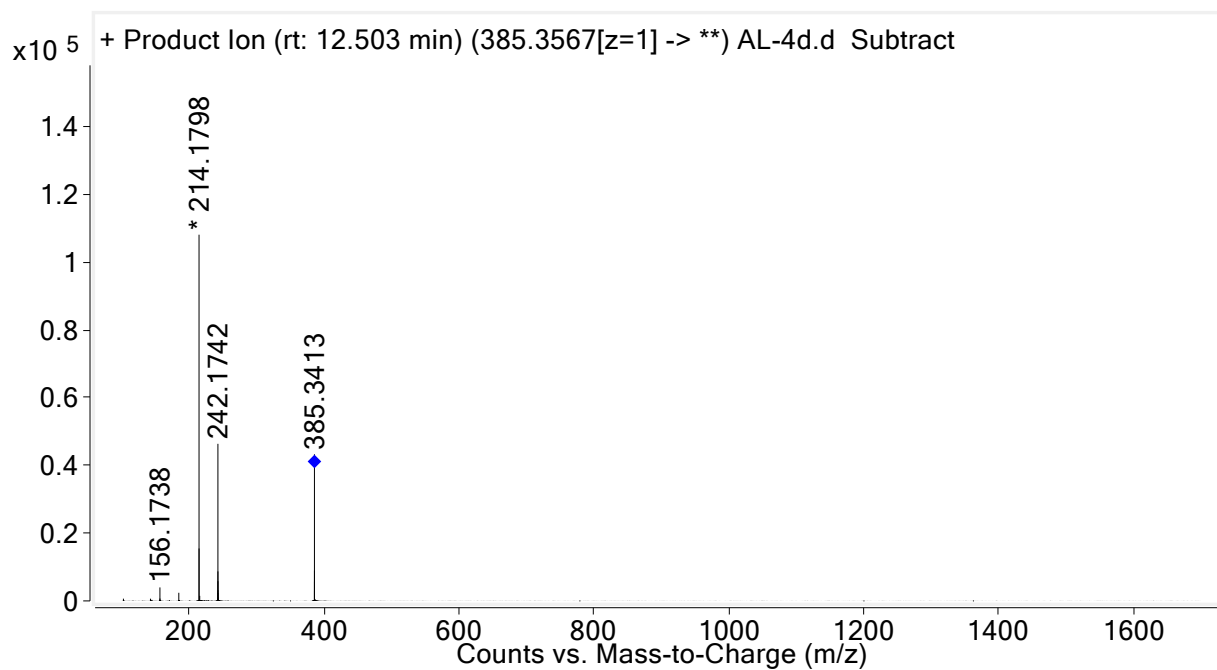

**Figure S12.** HRMS spectrum of compound **4d**.

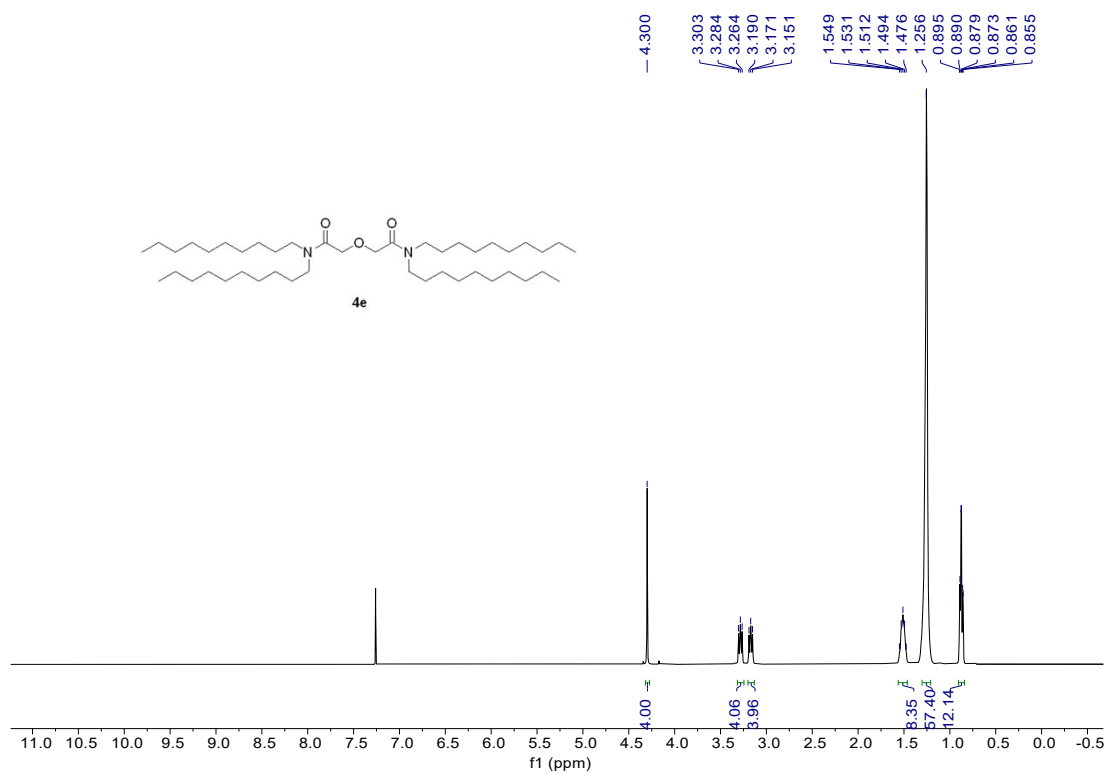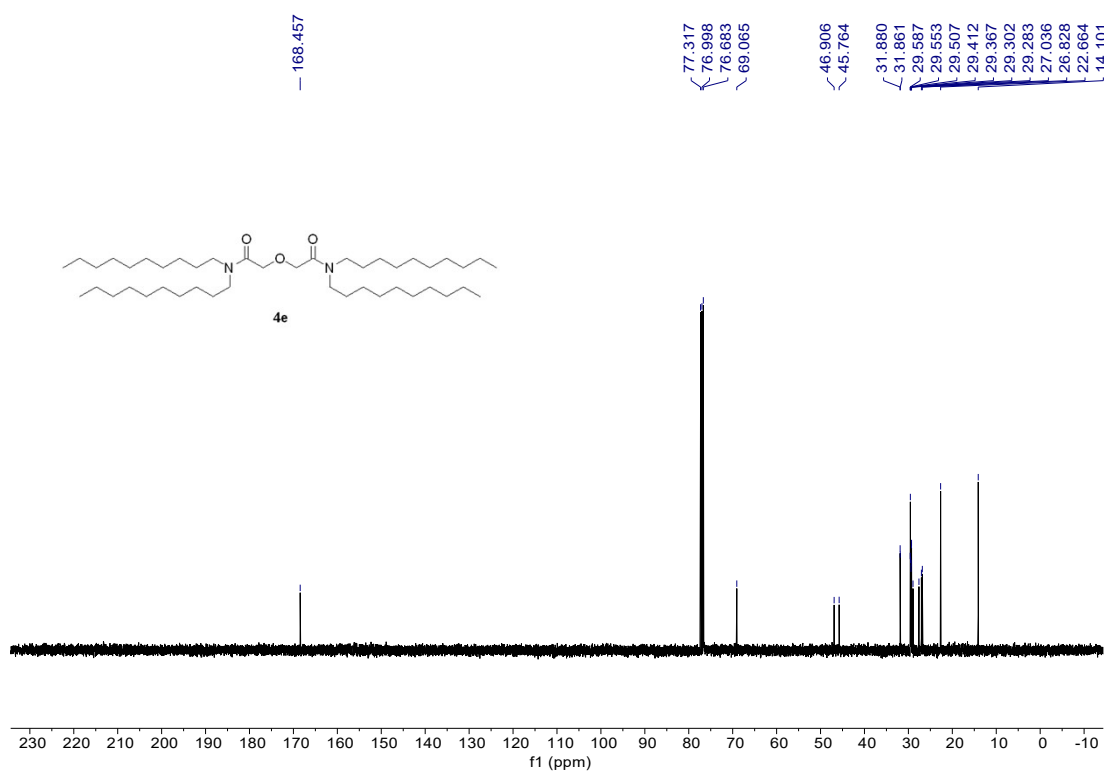

**Figure S13.**  $^1\text{H}$  NMR (600 MHz) and  $^{13}\text{C}$  NMR (151 MHz) spectra of compound **4e**.

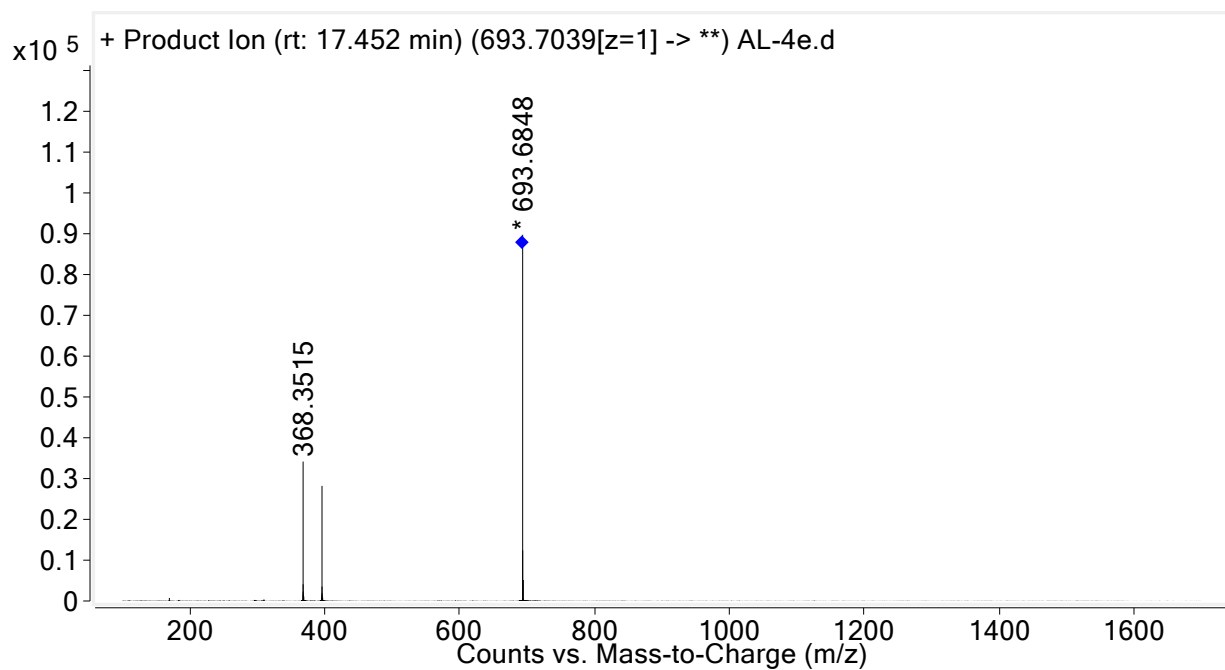

**Figure S14.** HRMS spectrum of compound **4e**.

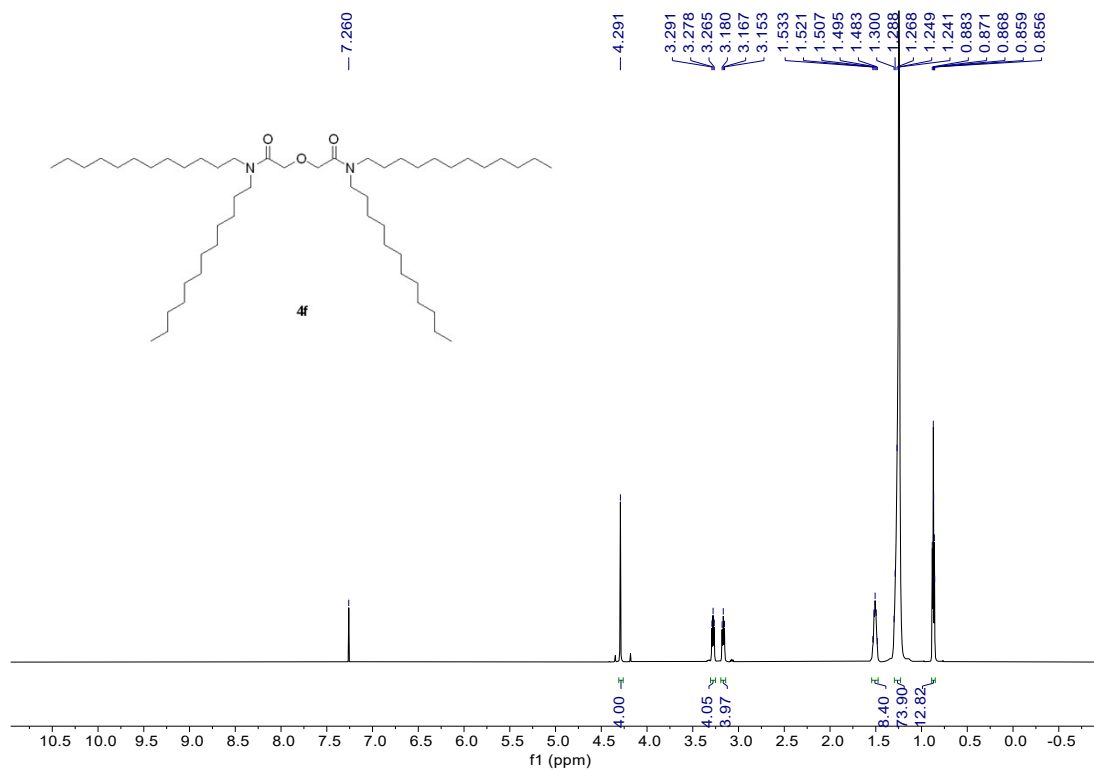



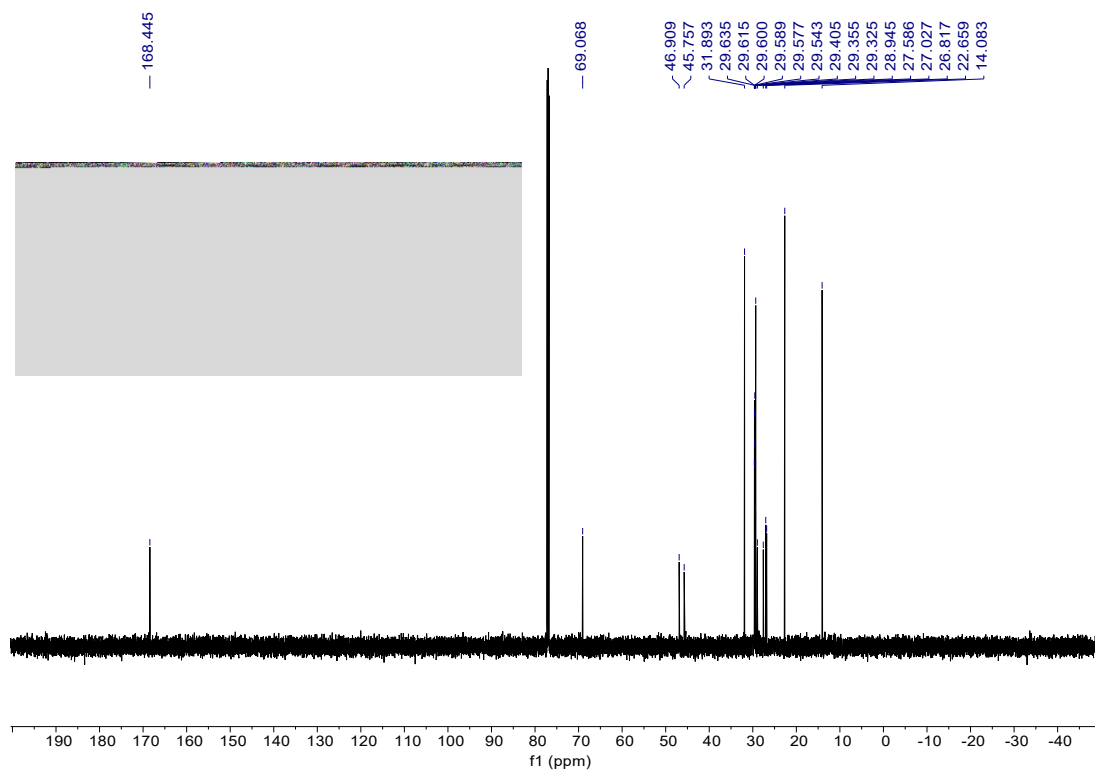

**Figure S15.**  $^1\text{H}$  NMR (600 MHz) and  $^{13}\text{C}$  NMR (151 MHz) spectra of compound **4f**.

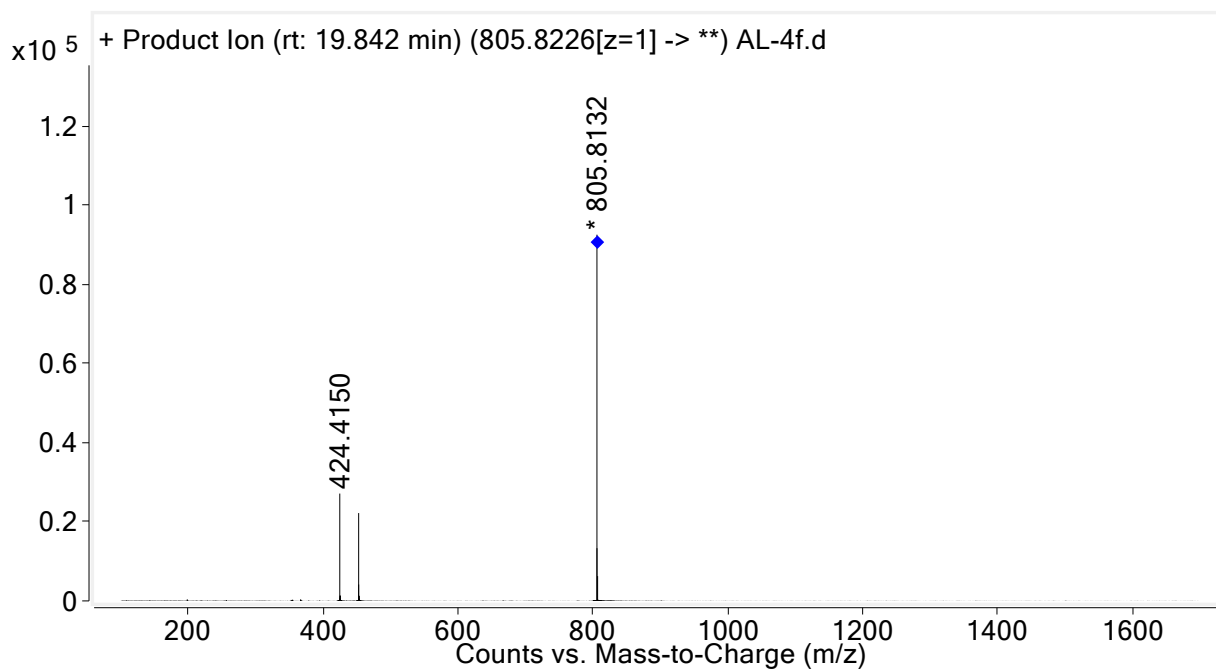

**Figure S16.** HRMS spectrum of compound **4f**.

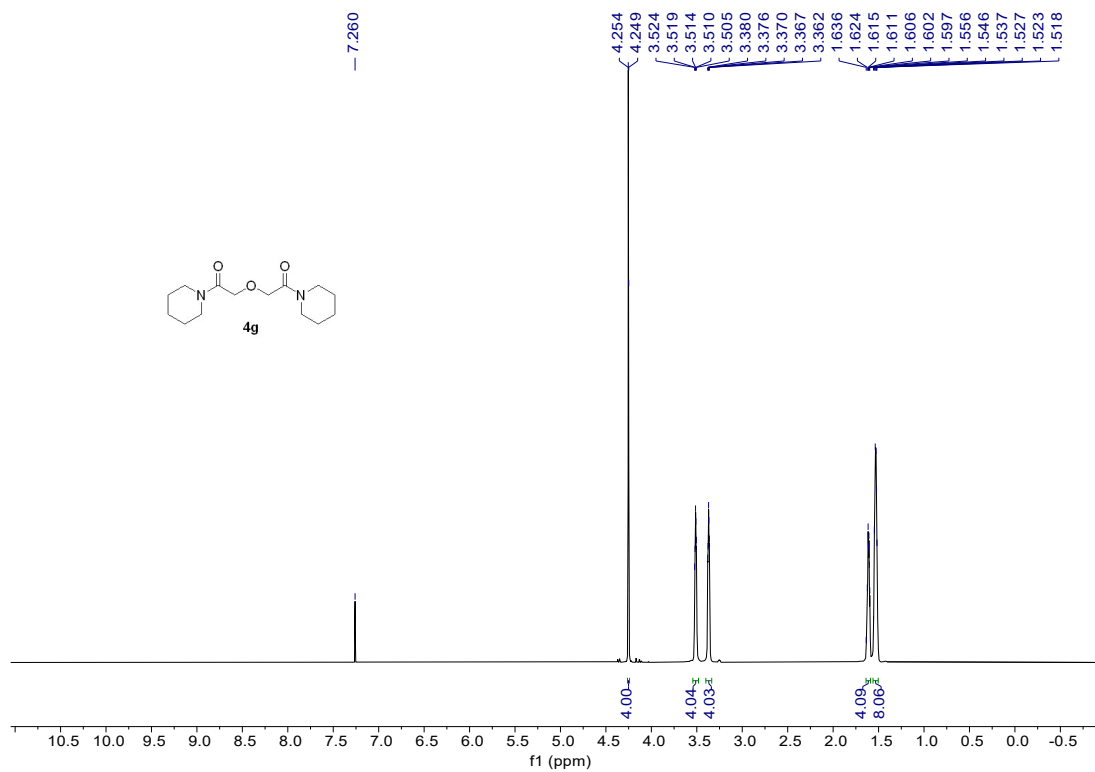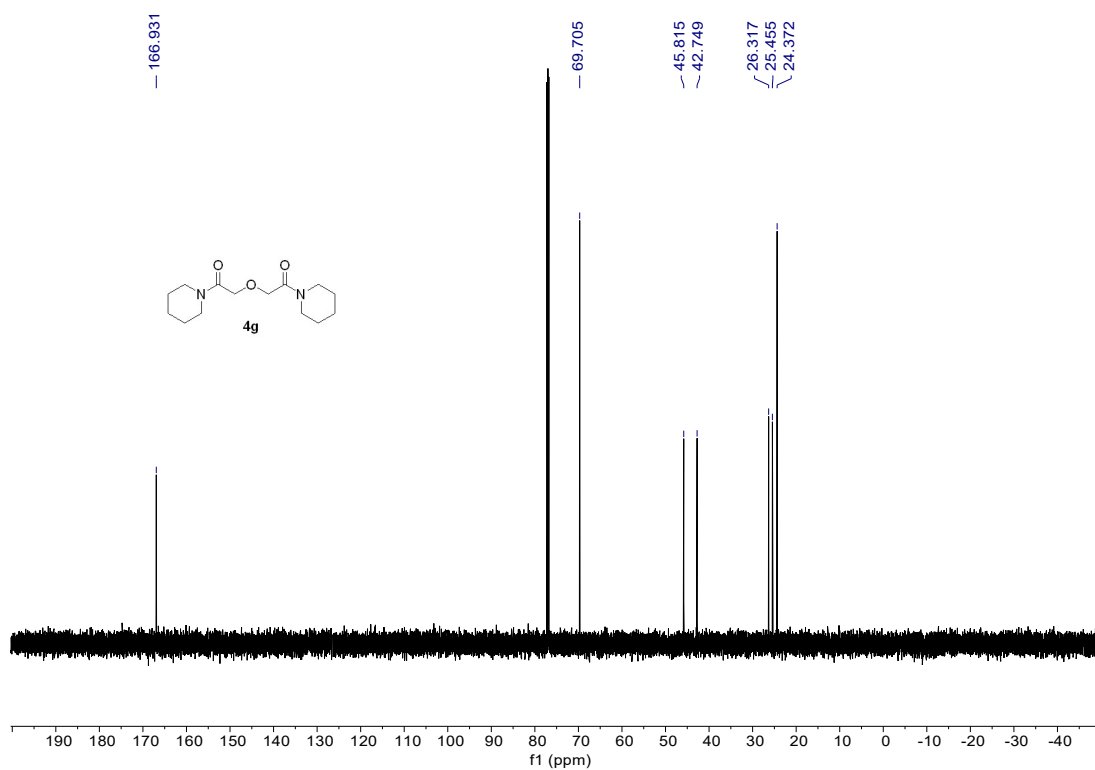

**Figure S17.**  $^1\text{H}$  NMR (600 MHz) and  $^{13}\text{C}$  NMR (151 MHz) spectra of compound **4f**.

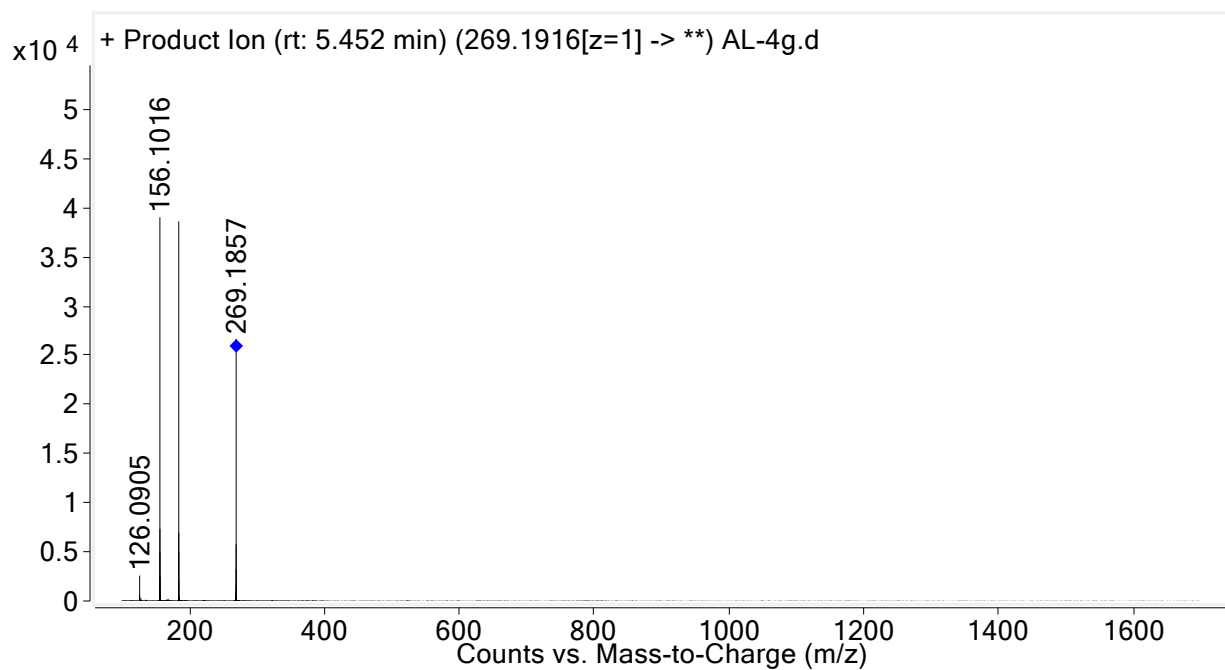

**Figure S18.** HRMS spectrum of compound **4g**.

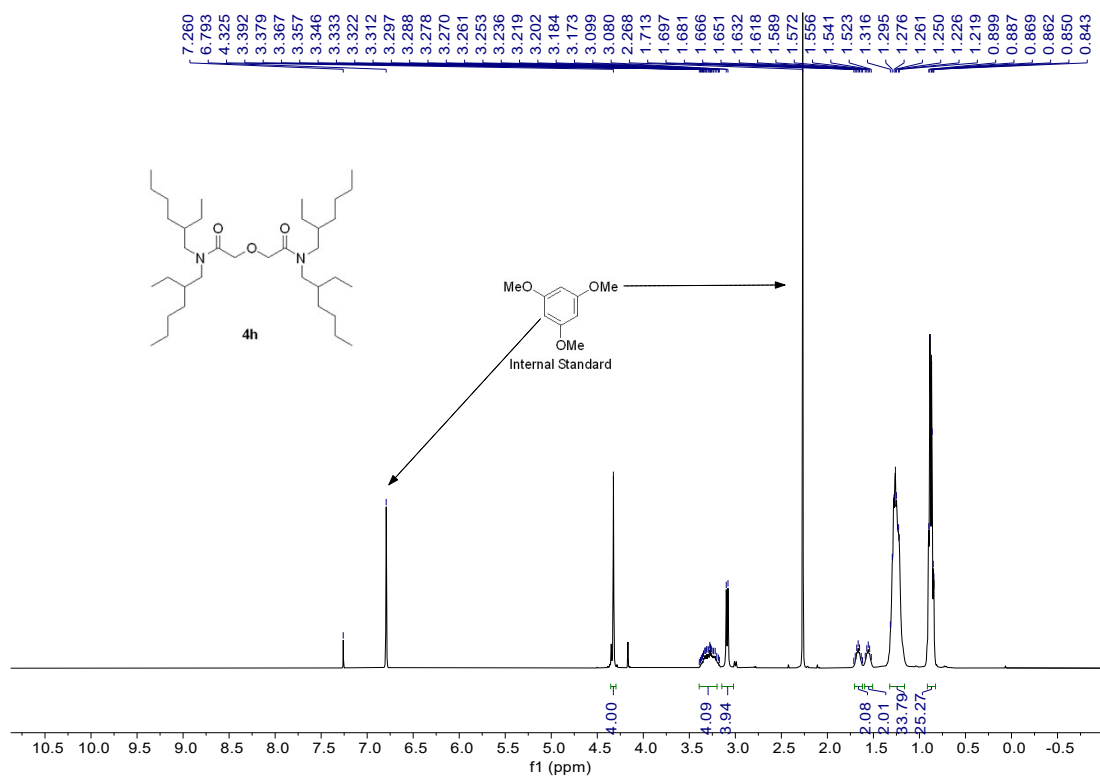

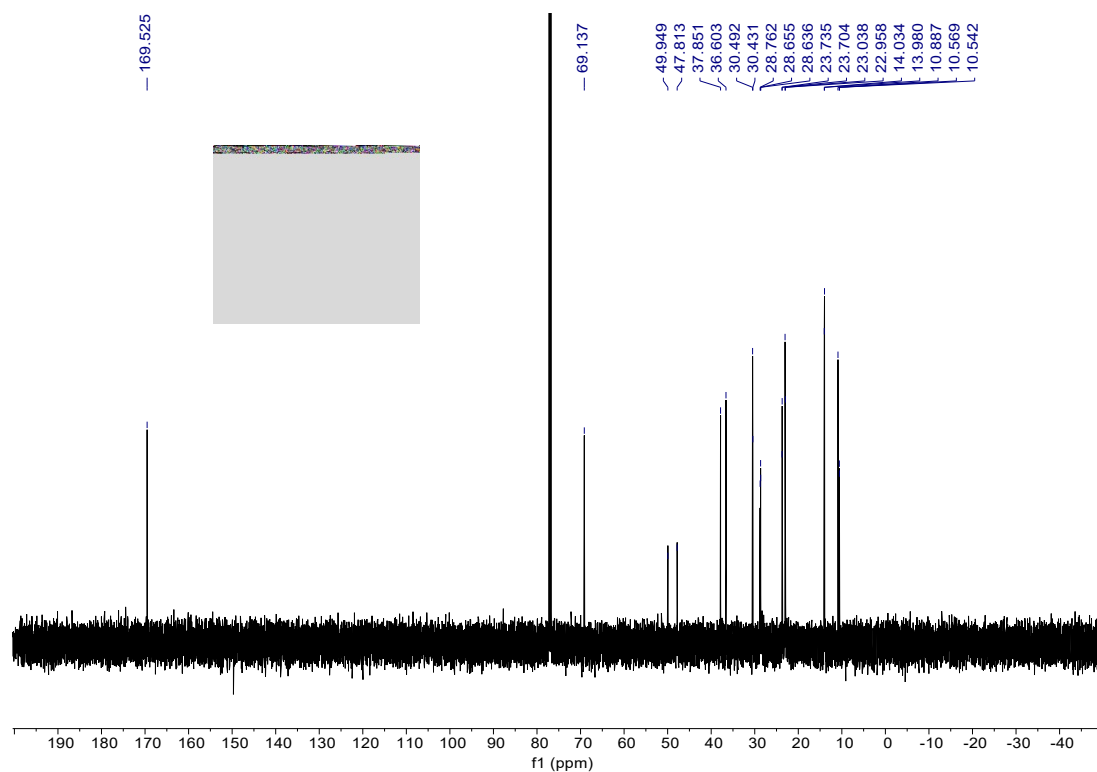

**Figure S19.**  $^1\text{H}$  NMR (600 MHz) and  $^{13}\text{C}$  NMR (151 MHz) spectra of compound **4h**.

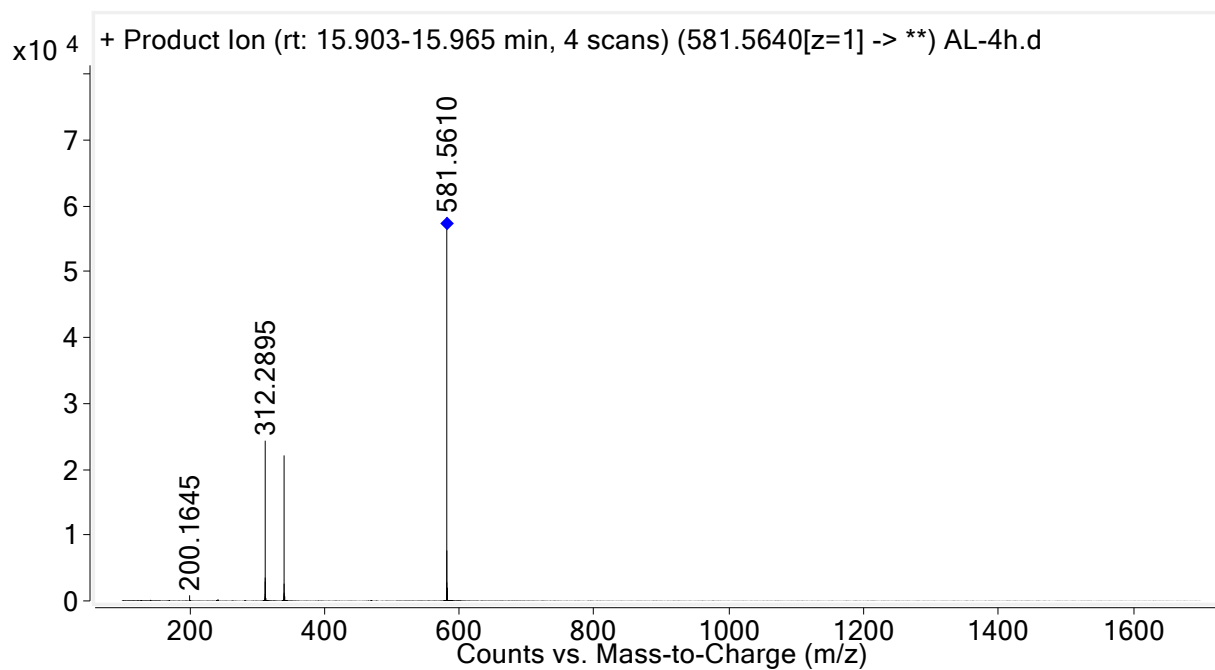

**Figure S20.** HRMS spectrum of compound **4h**.

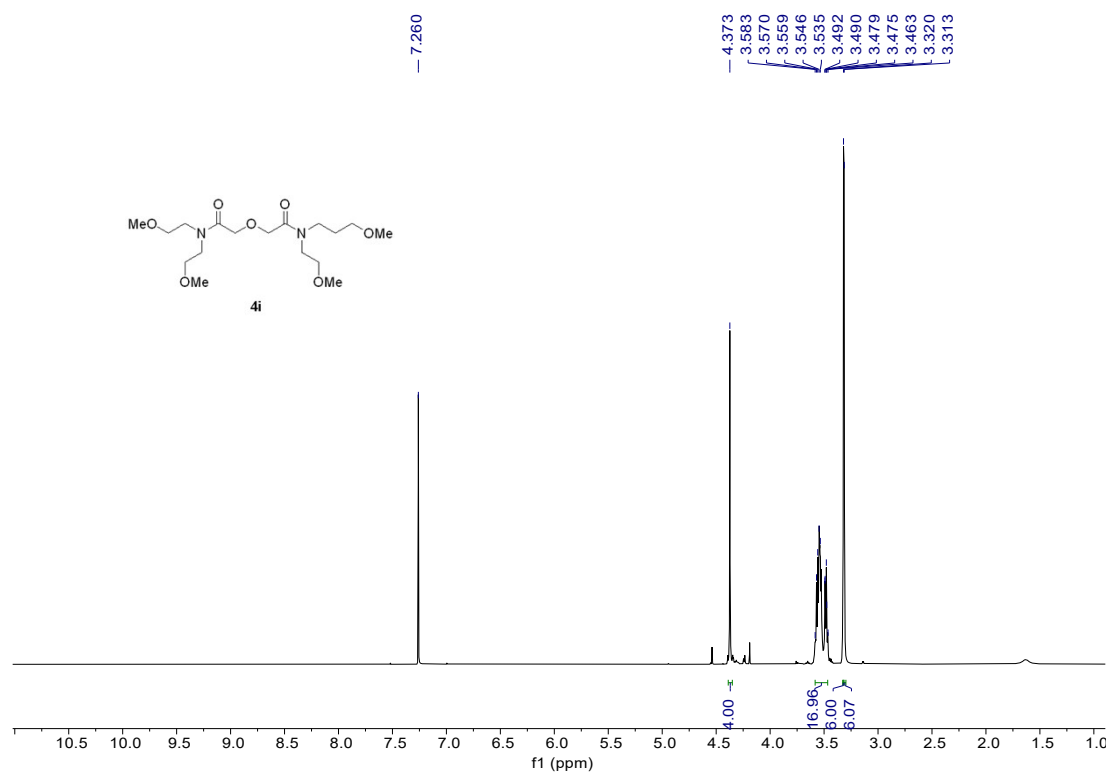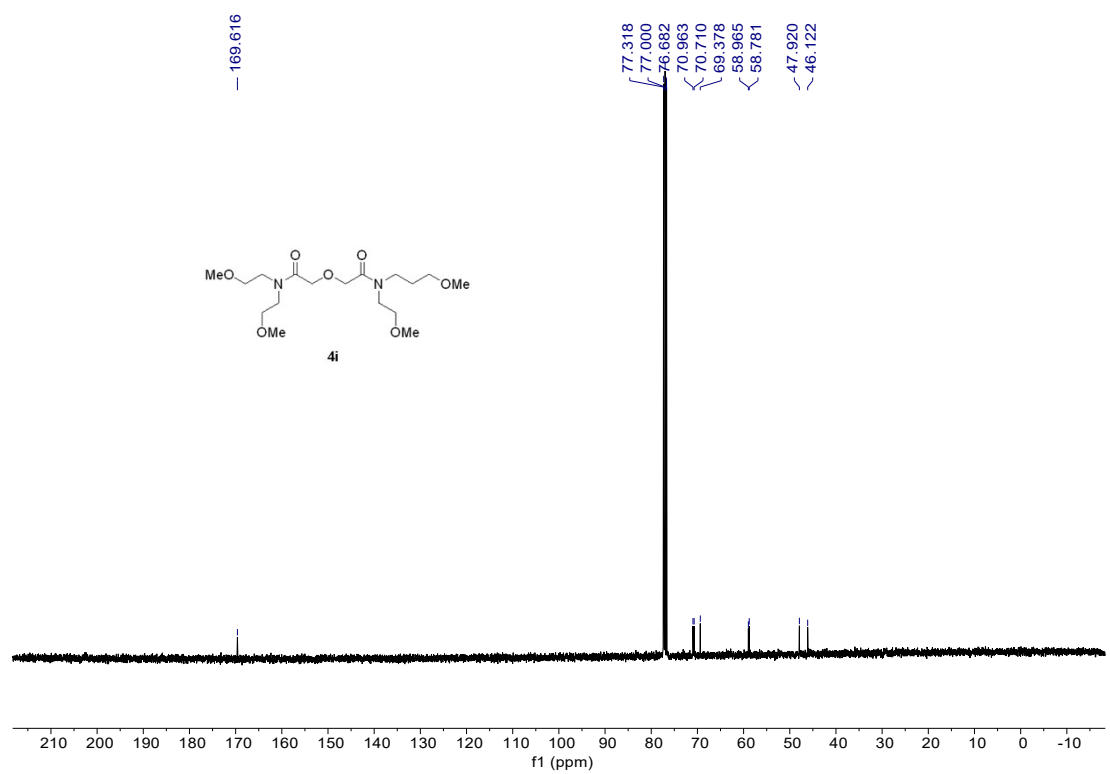

**Figure S21.**  $^1\text{H}$  NMR (600 MHz) and  $^{13}\text{C}$  NMR (151 MHz) spectra of compound **4i**.

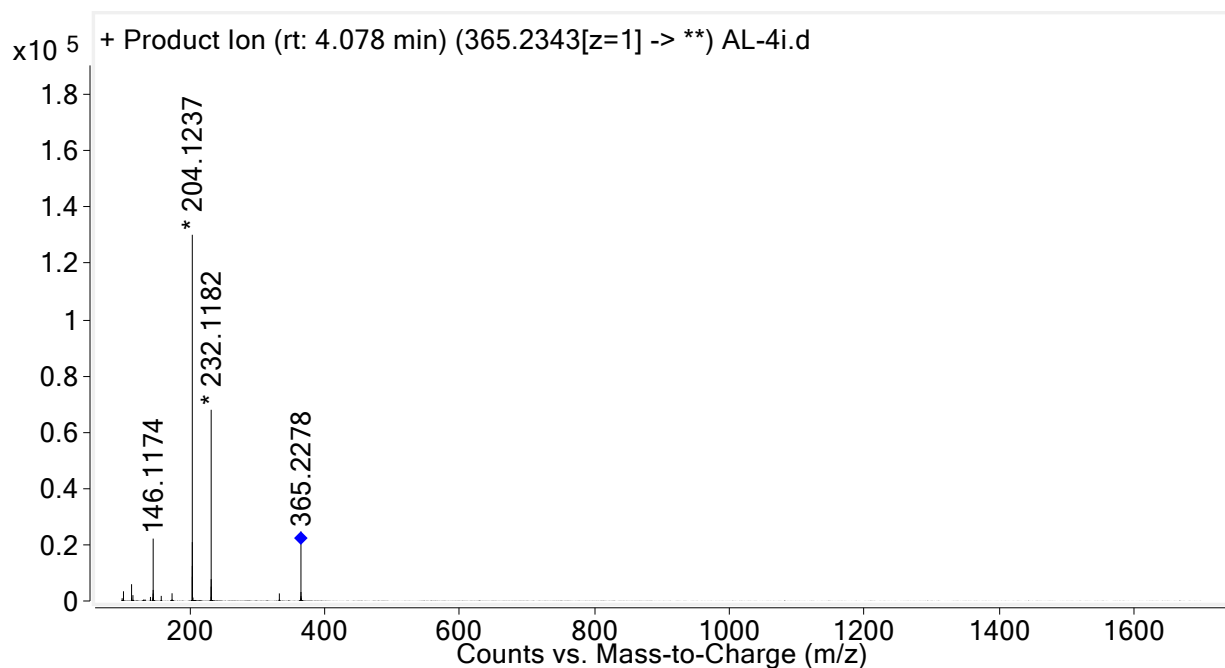

**Figure S22.** HRMS spectrum of compound **4i**.

## References

1. Z. Yang, H. J. Yang, J. Tian, C. Y. Guo and H. Kim, *J. Chem. Eng. Data*, 2011, **56**, 1191-1196.
2. A. Leoncini, J. Huskens and W. Verboom, *Synlett*, 2016, **27**, 2463-2466.
3. *China Pat.*, CN113861063, 2021.
4. N. Djedovic, R. Ferdani, E. Harder, J. Pajewska, R. Pajewski, M. E. Weber, P. H. Schlesinger and G. W. Gokel, *New J. Chem.*, 2005, **29**, 291-305.
